1 **TITLE PAGE**

2 **Classification:** Biological Sciences, Neuroscience

3

4 **Title:** A Feedback Mechanism Regulates *Odorant Receptor* Expression in the Malaria  
5 Mosquito, *Anopheles gambiae*

6

7 **Author Line:** Sarah E. Maguire<sup>a</sup>, Ali Afify<sup>a</sup>, Loyal A. Goff<sup>a,b</sup>, and Christopher J. Potter<sup>a</sup>

8

9 **Author Affiliation:** <sup>a</sup>The Solomon H. Snyder Department of Neuroscience, Johns  
10 Hopkins University School of Medicine, Baltimore, MD 21205, USA.

11 <sup>b</sup>The Department of Genetic Medicine, Johns Hopkins University School of Medicine,  
12 Baltimore, MD 21205, USA.

13

14 **Corresponding author:** Christopher J. Potter; Johns Hopkins University School of  
15 Medicine, Solomon H. Snyder Department of Neuroscience, Rangos 434, 855 N. Wolfe  
16 Street, Baltimore, MD 21205; 443-287-4151; cpotter@jhmi.edu

17

18 **Keywords:** Q-system, olfaction, calcium imaging, single sensillum recordings

19

20

21 **ABSTRACT**

22 Mosquitoes locate and approach humans ('host-seek') when specific Olfactory Neurons  
23 (ORNs) in the olfactory periphery activate a specific combination of glomeruli in the  
24 mosquito Antennal Lobe (AL). We hypothesize that dysregulating proper glomerular  
25 activation in the presence of human odor will prevent host-seeking behavior. In  
26 experiments aimed at ectopically activating most ORNs in the presence of human odor,  
27 we made a surprising finding: ectopic expression of an *AgOr* (*AgOr2*) in *Anopheles*  
28 *gambiae* ORNs dampens the activity of the expressing neuron. This contrasts studies in  
29 *Drosophila melanogaster*, the typical insect model of olfaction, in which ectopic  
30 expression of non-native ORs in ORNs confers ectopic neuronal responses without  
31 interfering with native olfactory physiology. To gain insight into this dysfunction in  
32 mosquitoes, RNA-seq analyses were performed comparing wild-type antennae to those  
33 ectopically expressing *AgOr2* in ORNs. Remarkably, almost all *Or* transcripts were  
34 significantly downregulated (except for *AgOr2*), and additional experiments suggest that  
35 it is AgOR2 protein rather than mRNA that mediates this downregulation. Our study  
36 shows that ORNs of *Anopheles* mosquitoes (in contrast to *Drosophila*) employ a  
37 currently unexplored regulatory mechanism of OR expression, which may be adaptable  
38 as a vector-control strategy.

39 **SIGNIFICANCE STATEMENT**

40 Studies in *Drosophila melanogaster* suggest that insect Olfactory Receptor Neurons  
41 (ORNs) do not contain mechanisms by which Odorant Receptors (ORs) regulate OR  
42 expression. This has proved useful in studies where ectopic expression of an OR in  
43 *Drosophila* ORNs confers responses to the odorants that activate the newly expressed  
44 OR. In experiments in *Anopheles gambiae* mosquitoes, we found that ectopic  
45 expression of an OR in most *Anopheles* ORNs dampened the activity of the expressing  
46 neurons. RNA-seq analyses demonstrated that ectopic OR expression in *Anopheles*  
47 ORNs leads to downregulation of endogenous *Or* transcripts. Additional experiments  
48 suggest that this downregulation required ectopic expression of a functional OR protein.  
49 These findings reveal that *Anopheles* mosquitoes, in contrast to *Drosophila*, contain a  
50 feedback mechanism to regulate OR expression. Mosquito ORNs might employ  
51 regulatory mechanisms of OR expression previously thought to occur only in non-insect  
52 olfactory systems.

53 Malaria is a major cause of human mortality worldwide (1), and it is a global health  
54 imperative to prevent the spread of this disease. Malaria is caused by *Plasmodium*  
55 parasites transmitted by the bite of infected *Anopheles* mosquitoes. To date,  
56 antimalarial drugs have been the mainstay of control against malaria, and over the past  
57 15 years, these treatments – along with the distribution of insecticide-treated bed nets –  
58 have contributed to an overall reduction of disease transmission. However, the eventual  
59 eradication of malaria likely rests on a multidisciplinary approach that integrates our  
60 knowledge of both host and vector biology (2). For example, impairing the ability of the  
61 insect vector to bite a human host may further reduce incidences of infection. As such,  
62 disrupting the behaviors that bring mosquitoes to humans could dramatically reduce the  
63 prevalence of malaria (3).

64 Female *Anopheles* mosquitoes locate and approach humans ('host-seek') based  
65 on specific cues, such as human-derived odors and exhaled CO<sub>2</sub>, moisture and heat  
66 emissions, and body shape. The primary way that mosquitoes host-seek is through their  
67 sense of smell (olfaction). Mosquitoes have evolved a complex repertoire of  
68 chemoreceptors that respond to chemical stimuli such as Ionotropic Receptors (IRs),  
69 Gustatory Receptors (GRs), and Odorant Receptors (ORs). Of these, the ORs play a  
70 substantial role in mediating how a mosquito responds to human odor (4). ORs form  
71 heterotetramer complexes with an obligate co-receptor known as ORCO (5). OR-ORCO  
72 complexes are expressed on Olfactory Receptor Neurons (ORNs) of the mosquito's  
73 sensory appendages: the antennae, maxillary palps, and labella (6). ORCO-positive  
74 ORNs are housed in 'sensilla' or sensory hairs of these appendages. Each sensillum  
75 typically contains 1-4 ORNs that each express a unique OR, of which there are 75 in the

76 *Anopheles gambiae* genome (7). These ORNs are classified and named by the OR  
77 gene they express, and each ORCO-positive ORN class targets a specific brain region  
78 of the mosquito Antennal Lobe (AL) known as a glomerulus (8, 9). The decision to  
79 approach a human is a direct result of activated ORCO-positive ORNs targeting a  
80 *specific* combination of glomeruli (10) (**Fig 1a,b**).

81         Disrupting this specificity by activating all ORCO-positive ORNs in the presence  
82 of human odor has been hypothesized to prevent host-seeking (11, 12). Studies in  
83 *Drosophila*, an insect model of olfaction, show that binary systems can be used to  
84 express non-native ORs in ORCO-positive ORNs to confer ectopic neuronal responses  
85 without interfering with native olfactory physiology. Therefore, we examined whether this  
86 strategy could be used to disrupt host-seeking in *Anopheles gambiae* mosquitoes. To  
87 test this, we expressed the *Anopheles gambiae* odorant receptor 2 (*AgOr2*) in all *Orco*-  
88 positive ORNs. AgOR2 is highly attuned to major components of human odor such as  
89 benzaldehyde and indole (13), and in the presence of human odor, all *Orco*-positive  
90 neurons expressing AgOR2 should become active. Surprisingly, when we evaluated the  
91 olfactory physiology of these experimental mosquitoes, we found that they exhibited  
92 reduced responses not only to AgOR2's cognate ligands (benzaldehyde and indole) but  
93 to odors in general. To investigate the molecular basis of this phenotype we looked for  
94 signatures of dysfunction at the level of the transcriptome. Using RNA-seq to compare  
95 transcript levels from wild-type antennae to those ectopically expressing *AgOr2*, we  
96 discovered that *odorant receptor* isoforms were significantly downregulated in the  
97 experimental line while the remaining transcripts were largely unchanged. Additional  
98 experiments revealed that it is AgOR2 protein rather than *AgOr2 mRNA* that reduces

99 native *odorant receptors* levels. Overall, our study suggests the existence of a feedback  
100 mechanism of *odorant receptor* regulation whereby an OR protein downregulates the  
101 transcripts of alternative *Or* genes.

102

## 103 **RESULTS**

104

105 **Ectopically Expressing *AgOr2* in *Orco*-positive Neurons Impairs Olfactory**  
106 **Physiology.** To activate *Orco*-positive ORNs in the presence of human odor, we used  
107 ‘olfactogenetics,’ a technique whereby a specific volatile odorant is used to activate a  
108 defined set of OR-expressing neurons (14). To accomplish this, an *Or* with known  
109 response properties is ectopically expressed in ORNs of interest through the use of a  
110 binary expression system, such as the Q-system (15) or the *UAS*-Gal4 system. Thus, in  
111 the presence of odors in which the introduced OR normally responds, olfactory receptor  
112 neurons with ectopic expression become active.

113 In 2016, the Q-system was introduced into *Anopheles*, making it possible to  
114 adapt olfactogenetics in mosquitoes (6). As a binary expression system, the Q-system  
115 works by directing the expression of a specific gene into a specific cell population. This  
116 particular system relies on two elements: QF2 and *QUAS*. The QF2 transcription factor  
117 is expressed under the control of a cell-type specific enhancer/promoter and binds to its  
118 upstream activating sequence, *QUAS*. Once bound by QF2, *QUAS* initiates  
119 transcription of its effector gene. To ectopically activate *Orco*-positive ORNs in the  
120 presence of human odor, we combined a mosquito line containing *Orco-QF2* (6), which  
121 contains a fusion between the presumptive enhancer and promoter regions of the gene

122 *Orco* and the transcription factor QF2, with an effector line containing a *QUAS*  
123 transgene upstream of the *Anopheles gambiae* odorant receptor 2, *AgOr2* (*QUAS-*  
124 *AgOr2*). Thus, experimental animals exhibit ectopic expression of *AgOr2* in all *Orco*-  
125 positive ORNs (**Fig. 1c**).

126 *AgOR2* is highly attuned to major components of human odor such as  
127 benzaldehyde and indole (16) and it was expected that *Orco*-positive ORNs of  
128 *Orco>AgOr2* mosquitoes would become active in the presence of these cognate  
129 ligands, essentially activating the majority of the olfactory system during host-seeking  
130 (**Fig. 1d**). To test the functional activity of olfactory receptor neurons ectopically  
131 expressing *AgOr2* in mosquitoes, we imaged the calcium response of *Orco>AgOr2*  
132 antennal segments in a *QUAS-GCaMP6f* background (*Orco>AgOr2,GCaMP6f*).  
133 Surprisingly, *Orco>AgOr2,GCaMP6f* antennae showed a dampened response not only  
134 to various concentrations of benzaldehyde and indole, but to odors in general (**Fig. 2a**).  
135 For example, octenol potentially activates 31 different *Anopheles gambiae* ORs (16),  
136 but the olfactory receptor neurons of the experimental mosquitoes did not show a  
137 response to this odor. In *Drosophila*, a single ORN class can drive behavior at spike  
138 rates as low as 10-20Hz (10). When we stimulated *Orco>AgOr2,GCaMP6f* with 5  
139 additional odors known to activate 14-16 different ORN classes at rates higher than 50  
140 spikes/sec (16), the olfactory receptor neurons still did not exhibit odor-induced  
141 responses (**Fig. S1**).

142 One possibility for the observed olfactory defects (**Fig. 2a, Fig. S1**) is that the  
143 *QUAS-AgOr2* transgene inserted into an endogenous olfactory gene and disrupted  
144 olfactory functions. As determined by splinkerette mapping (17), the insertion site of the

145 *QUAS-AgOr2* line examined in **Fig. 2a** and **Fig. S1** (line 1) is located in an intergenic  
146 region on chromosome 3R between the genes ACOM029303 and ACOM029196. While  
147 it is unlikely that this particular insertion site would disrupt the function of an olfactory  
148 gene necessary for ORN physiology, we extended our studies to analyze the physiology  
149 of two additional *QUAS-AgOr2* lines inserted into different regions of the genome. We  
150 established line *QUAS-AgOR2#2*, which maps to an intergenic region between  
151 ACOM036217 and ACOM036230, and line *QUAS-AgOR2#3*, which could not be  
152 mapped by splinkerette PCR. When driven into *Orco*-positive cells, all three lines show  
153 similar defects in olfactory physiology when compared to wild-type (**Fig. S2**).  
154 Furthermore, since these lines were tested as heterozygotes, any recessive mutation in  
155 an olfactory gene caused by the *QUAS-AgOr2* insertion should be compensated by the  
156 wild-type allele. Overall, these data show that the dominant negative olfactory  
157 phenotype (**Fig. 2a, Fig. S1, Fig. S2**) is a consequence of ectopic *AgOr2* expression  
158 rather than the genomic insertion site of the *QUAS-AgOr2* element.

159

#### 160 **Olfactogenetics Impairs *Anopheles* but not *Drosophila Orco*-positive ORNs.**

161 Ectopically expressing an *Or* in *Drosophila* ORNs causes the expressing neuron to  
162 activate in the presence of the introduced OR's odor ligand (14, 16, 18-20). One  
163 possibility as to why *Orco>AgOr2* cells in the mosquito did not respond to benzaldehyde  
164 or indole was because the *AgOr2* sequence used to create the transgenic *QUAS-AgOr2*  
165 line was perhaps acting in a dominant-negative manner to disrupt ORCO/OR<sub>x</sub> ion  
166 channels. To test this, we ectopically expressed *AgOr2* in *Drosophila Orco*-positive  
167 neurons using the GAL4-UAS system and measured the response rate of neurons



168 housed in the ab1 sensilla using Single Sensillum Recordings (SSR). Ab1 contains 4  
169 olfactory neurons: 3 of which are *Orco*-positive and express *Or10a*, *Or42b*, and *Or92a*,  
170 and one of which is *Orco*-negative and expresses the gustatory receptor *Gr21*, which  
171 responds to CO<sub>2</sub>. To determine whether ectopic expression of *AgOr2* impairs native OR  
172 responses to their cognate ligands, responses of the OR10a-expressing neuron to  
173 methyl salicylate were measured. We found no difference in how control (*Orco-GAL4*)  
174 and experimental (*Orco>5xAgOr2*) sensilla responded to methyl salicylate, indicating  
175 that *AgOr2* expression does not interfere with the olfactory physiology of the neuron in  
176 which it is expressed. Furthermore, native responses of OR10a were not affected when  
177 an even higher dosage of *AgOr2* was driven into the neuron (*Orco>20xAgOr2*) (**Fig.**  
178 **2b**). When we puffed benzaldehyde over the experimental preparation, *Orco*-positive  
179 cells in the *Drosophila* ab1 sensilla ectopically respond. Interestingly, sensilla that have  
180 higher levels of ectopic *AgOr2* can still maintain ectopic responses without  
181 compromising neuron function. When we used the stronger effector line (*20XUAS*) to  
182 ectopically express *AgOr2* in *Drosophila* *Orco*-positive neurons, the olfactogenetics  
183 approach continued to work and olfactory physiology was not impaired.

184 The *Anopheles* capitata peg (cp) sensillum is similar to the ab1 sensillum of  
185 *Drosophila* as it contains *Orco*-positive ORNs, which express *Or8* and *Or28*, and one  
186 *Orco*-independent olfactory neuron that responds to CO<sub>2</sub>. When we ectopically  
187 expressed *AgOr2* in *Orco*-positive ORNs in the mosquito and recorded from cp sensilla,  
188 we found that the OR8-expressing neuron's response to octenol, its cognate ligand, was  
189 eliminated (**Fig. 2c**). In addition, neither OR8 nor OR28-expressing neurons ectopically  
190 respond to benzaldehyde. Similar to *Drosophila*, the genetic manipulation does not

191 affect the physiology of the *Orco*-negative CO<sub>2</sub>-responsive neuron (**Fig. 2c**). These data  
192 indicate that olfactogenetics affects the physiology of *Drosophila* and *Anopheles* *Orco*-  
193 positive ORNs differently: in flies, ectopically expressing *Ors* does not affect  
194 endogenous neuronal function, whereas in *Anopheles* mosquitoes, ectopic expression  
195 of an *Or* disrupts the function of the olfactory receptor neurons.

196  
197 **Ectopic AgOR2 protein eliminates olfactory responses in *Orco*-positive cells.** It is  
198 possible that driving an *Or* into an *Anopheles* ORN is cytotoxic, especially if the neuron  
199 experienced continual stimulation from the environment. To assess whether this was  
200 the case, we examined the anatomy of the AL and ORN projections in *Orco>AgOr2*  
201 mosquitoes, to check for intact neuronal processes. As shown previously (6), ablating  
202 *Orco*-positive cells would cause their ORN projections to be eliminated in the AL. Using  
203 immunocytochemistry to visualize ORN terminals in the AL, both the ORN projections and  
204 the AL in general remained intact, indicating that the lack of ORN responses to odor  
205 was not due to the death and elimination of neurons ectopically expressing *AgOr2* (**Fig.**  
206 **S3**). Next we tested if driving any generic transmembrane protein into *Anopheles* ORNs  
207 also hindered olfactory physiology. To evaluate this, we used the *Orco-QF2* driver to  
208 ectopically express the transmembrane protein *mCD8::GFP* (6) into all *Orco*-positive  
209 neurons. There were no differences in the odor-induced responses between control and  
210 *mCD8::GFP*-positive ORNs (**Fig. S4**), suggesting that ectopic expression of another  
211 transmembrane protein did not silence ORN activities.

212 Ectopic *AgOr2* expression may inhibit olfactory responses either at the level of  
213 the *AgOr2* RNA or at the level of AgOR2 protein. To distinguish between these two

214 possibilities, we created a transgenic mosquito line containing a mutated version of  
215 *AgOr2* (*mutAgOr2*) that contained a mutation in the start codon of *AgOr2* such that  
216 *QUAS-mutAgOr2* produced mRNA that cannot be translated when combined with *Orco-*  
217 *QF2*. We also induced a frameshift mutation at a second in-frame ATG site in *mutAgOr2*  
218 to eliminate the possibility of having an alternative open reading frame used during  
219 translation. We crossed *QUAS-mutAgOr2* with *Orco-QF2*, *QUAS-GCaMP6f* and found  
220 that the calcium responses were not compromised (**Fig. 3**); only when the functional  
221 version of the protein was expressed (*QUAS-AgOr2*) was the odor response impaired  
222 (**Fig. 2a,c, Fig. S1, Fig. S2**). Taken together, these data indicate that AgOR2 protein  
223 itself, and not mRNA, was largely responsible for the olfactory defect of *Orco*-positive  
224 cells.

225

226 **Ectopic AgOR2 Reduces the Transcripts of Native *Ors*.** How might AgOR2 protein  
227 impair olfactory responses? We hypothesized this may occur as a result of 1) regulatory  
228 mechanisms affecting *Or* transcription, stability, and/or degradation rates or 2)  
229 regulatory mechanisms and/or defects in OR protein function. These transcriptional or  
230 post-translational mechanisms may act together, or independently. To distinguish  
231 between these two possibilities, we performed isoform-level RNA-seq on antennae  
232 isolated from control and *Orco>AgOr2* samples. Of the ~13,000 transcript isoforms  
233 detected, only 83 were differentially expressed in the *Orco>AgOr2* mosquito antennae.  
234 Interestingly, half of these differentially expressed isoforms (41/83) were *Ors*, which  
235 were all downregulated in *Orco>AgOr2* antennae, except for *AgOr2*, which was highly  
236 upregulated (**Fig. 4a**). As shown by the *Or* isoform comparison heatmaps in **Figure 4b**,

237 control *Or* levels are higher than those in *Orco>AgOr2*, with the exception of *AgOr2*,  
238 which is upregulated.

239 If AgOR2 ectopic protein was responsible for modulating the steady state  
240 abundance of native *Or* transcripts, then the relative abundance of the *odorant receptor*  
241 gene family isoforms in *Orco>mutAgOr2* antennae should not be affected. To test this,  
242 we extracted biological triplicates of mosquito antennae from female mosquitoes of the  
243 *Orco>mutAgOr2* line and compared the isoform abundance levels of this group to the  
244 original RNA-seq dataset. Ternary plots depicting the relative abundance of isoform  
245 expression levels in control, *Orco>mutAgOr2*, and *Orco>AgOr2* conditions as a position  
246 on an equilateral triangle were used to explore how *Or* and other gene sets were  
247 differentially expressed. To depict how control, *Orco>mutAgOr2*, and *Orco>AgOr2*  
248 contribute to relative isoform abundances of non-*Or* genes and *Or* genes, we created 2  
249 discrete ternary plots. As expected, the relative contribution of control, *Orco>mutAgOr2*,  
250 and *Orco>AgOr2* for all non-*odorant receptor* isoform in the transcriptome was roughly  
251 equal (34.3%:33%:32.6%). However, when removing the contribution of the ectopically  
252 induced *AgOr2* from the *Or* isoform pool, the ratio for the *odorant receptor* family was  
253 skewed to 45.8%:37.8%:16.4% (control:*Orco>mutAgOr2*:*Orco>AgOr2*) (**Fig. 4c**),  
254 indicating that the relative contribution of an *Or*'s abundance level was roughly equal  
255 among control and *Orco>mutAgOr2* groups, but reduced in *Orco>AgOr2*. Results of the  
256 gene set enrichment test and pairwise comparisons of *Or* isoforms can be viewed in  
257 **Figure S5**. The majority of native *Ors* are downregulated in *Orco>AgOr2* but not in  
258 *Orco>mutAgOr2*, with four exceptions: *Or2*, *Or16*, *Or17*, and *Or33*.

259

260 **As visualized by the onset of ORCO expression, ectopic AgOR2 is driven**  
261 **immediately after larval-pupal ecdysis.** We next examined when, during the life cycle  
262 of the mosquito, the downregulation of native *Or* genes via ectopic AgOR2 expression  
263 might occur. Since ectopic AgOR2 expression is dictated by the *Orco*  
264 enhancer/promoter region (**Fig. 1c**) (6), AgOR2-induced olfactory silencing of native *Or*  
265 genes should coincide with the ORCO expression pattern. Mosquitoes experience four  
266 different developmental stages during their lifespan: egg, larvae, pupae, and adult  
267 stages. During the pupal stage, adult features of the mosquito olfactory system take  
268 shape (21, 22), so we examined this stage of development for the onset of ORCO  
269 expression. To document this, we extracted and stained pupal antennae from  
270 *Orco>mCD8::GFP* mosquitoes every 4hrs starting at the onset of pupal development  
271 (After Puparium Formation: 0-2hr APF) to just before eclosion (20-22hr APF), which  
272 happens at 24hrs APF. ORCO (as reported by mCD8) was expressed immediately after  
273 pupal ecdysis, just 0-2hrs APF (**Fig. S6a**). Interestingly, ORCO expression turns on  
274 gradually in the developing antennal ORNs, where each flagellomere gains ~15 Orco-  
275 positive cells every 4hrs, starting from ~8 cells at 0-2hr APF and ending with ~87 cells  
276 per flagellomere at 4hrs before eclosion (**Fig. S6b**). These data suggest that ectopic  
277 expression of AgOR2 (which should coincide with ORCO) also occurs throughout pupal  
278 development, and might impinge upon developmental mechanisms that regulate *Or*  
279 expression. The timepoint at which native *Or* genes begin to express in *Anopheles* is  
280 not currently known, but in *Aedes aegypti* several *Ors* (in addition to *Orco*, as detected  
281 by *in situs*) are present 3/4ths of the way through the pupal stage (23). This suggests  
282 that in natural conditions, negative inhibition of *AgOr* genes by AgOR protein might

283 occur during the pupal stage, when adult features of the olfactory system are being  
284 developed.

285

286 **Impairing *Orco*-positive neuron responses does not inhibit host-seeking behavior**  
287 **in *Anopheles* mosquitoes.** In the absence of an *Orco* mutant, the olfactory phenotype  
288 of *Orco>AgOr2* mosquitoes presented the opportunity to test whether *Anopheles*  
289 mosquitoes without ORN function still host-seek. DeGennaro et al. 2013 (4) found that a  
290 null mutation of the *Orco* gene in *Aedes* mosquitoes did not prevent host-seeking  
291 behavior (presumably due to redundant function of IR neurons (24)), but whether the  
292 malaria mosquito would behave similarly is unknown. To test whether *Orco>AgOr2*  
293 mosquitoes showed reduced attraction towards human hosts, we used the ‘host-  
294 proximity assay’ (4), a population assay that measures the proportion of females that  
295 come into olfactory (but not physical) contact with a human arm. As found with *Orco*  
296 mutant *Aedes* mosquitoes (4), *Anopheles* mosquitoes without functional *Orco*-positive  
297 neurons were still attracted to a human host (**Fig. 5a-c**).

298

## 299 **DISCUSSION**

300

301 We report for the first time, to our knowledge, an unexplored mechanism of *Or*  
302 regulation in *Anopheles* mosquitoes that diverges from the dogma established in  
303 *Drosophila*. A main finding of our paper – that OR protein downregulates the expression  
304 of native *Ors* (**Fig. 5d**) – is a pattern more closely resembling OR-regulatory processes  
305 in mice than those of *Drosophila*. As this (**Fig. 2b**) and previous studies have

306 demonstrated (14, 18, 20) driving ectopic expression of an *Or* in non-native *Orco*-  
307 positive ORNs does not disrupt *Drosophila* neuron function whereas in *Anopheles* it  
308 does (**Fig. 2a,c, Fig. S1, Fig. S2**). Furthermore, ectopically expressing an *Or* gene in  
309 *Drosophila* ORNs does not affect gene expression of native *Ors* (20), whereas a similar  
310 manipulation in *Anopheles* leads to robust changes in gene expression (**Fig. 4**).

311 From these experiments, we hypothesize unexpected similarities of *Or* gene  
312 regulation between *Anopheles* and mice. For example, both *Anopheles* and mice  
313 contain a negative feedback loop by which OR protein inhibits the expression of  
314 alternative *Ors*. In *Anopheles* mosquitoes (**Fig. 3, Fig. 4**) as was the case in mice, this  
315 feedback pathway requires intact OR protein (with 3 exceptions: see **Fig. S5**) since  
316 expressing mutant *Or* genes lacking either the entire coding sequence or the start  
317 codon permits a second *Or* gene to be expressed (25-28). Frameshift mutations also  
318 allow for the co-expression of functional *Or* genes (25). It remains to be determined if  
319 this repression in *Anopheles* olfactory receptor neurons utilizes similar cellular  
320 machinery as in mice (29).

321 What might be the selective advantage of an *Anopheles* mosquito *Or* feedback  
322 mechanism? One possibility is that it increases the likelihood that a single olfactory  
323 receptor neuron expresses only 1 OR. This is an important developmental mechanism  
324 in mice, where ORs play an instructive role in guiding olfactory receptor neuron axonal  
325 projections to the olfactory region of the brain (30-32). In analogous experiments to  
326 those presented here, when multiple ORs are genetically engineered to co-express in a  
327 single olfactory receptor neuron in mice, the topographic map of projections to the  
328 olfactory center in the brain is perturbed (33). While we do not know when native *Or*

329 genes turn on or when ORNs target the AL in *Anopheles*, our methods expressed  
330 *AgOr2* in *Orco* neurons as early as 0-2hr APF (**Fig. S6**). If ORNs have not yet targeted  
331 the AL at this early stage, our data suggests that *Ors* in mosquitoes are likely not  
332 involved in axon guidance, as we did not detect major deformations of ORN targeting or  
333 AL structure in the adult brain (**Fig. S3**). What might be another biological process  
334 influenced by OR gene regulation? If this mechanism functions during adulthood, it  
335 could be important for synchronizing a mosquito's dynamic biological needs in the  
336 environment with the physiology of olfactory receptor neurons. Mosquitoes rely heavily  
337 on their sense of olfaction to integrate ecologically relevant stimuli that change over the  
338 course of their adult lifespan. When females first eclose, they are uninterested in host  
339 odor (34) and instead actively search for sugar-rich resources from plants to  
340 supplement their nutrient reserves. After a period of ~4 days post eclosion, they develop  
341 an attraction to host odors (34, 35) and following a bloodmeal will experience a  
342 refractory period to host odor until after oviposition. These changes in behavior have  
343 been correlated with changes in chemosensory gene transcript abundance (34, 36). It  
344 would be interesting to determine if expression of alternative *Ors* in ORNs only during  
345 adulthood – when endogenous ORs are already chosen – can alter *Or* gene expression,  
346 or if precocious expression of *Ors* takes on an 'early-bird-gets-the-worm' paradigm (37).

347 *AgOrs* can be co-expressed within the same ORN when transcribed as  
348 polycistronic mRNA (38). Polycistronic *Or* mRNA is observed in cases when *Or* genes  
349 are clustered tightly together within the genome. Such clustering of *Or* genes is  
350 commonplace in mosquito species such as *Anopheles gambiae* (39) and *Aedes aegypti*  
351 (40), as well as in mice (41, 42); however, to our knowledge, polycistronic *Or* mRNA has



352 not been observed in rodent olfactory systems. It is possible that polycistronic *Or*  
353 expression avoids the negative feedback mechanism of *Or* regulation, enabling the  
354 neuron to co-express multiple *Ors*.

355 While ectopically expressing *AgOr2* downregulates native *Or* genes, it was  
356 surprising that *Orco>AgOr2* neurons did not show responses to the cognate ligands of  
357 AgOR2 (benzaldehyde and indole). Our RNA-seq data indicates that while native *Or*  
358 transcripts are reduced, *AgOr2* transcripts are 3x higher than in wild-type conditions: if  
359 *AgOr2* transcripts are being translated, this could lead to 3x the amount of AgOR2  
360 protein. We hypothesize that elevated AgOR2 protein levels may be disrupting the  
361 stoichiometry of the AgOR2-ORCO complexes, rendering them non-functional. While  
362 research has shown that ORs form stable heteromeric complexes with ORCO (43-46),  
363 the stoichiometry underlying OR-ORCO channels is unknown. RNA-seq data from this  
364 study and from two independent studies show that in wild-type conditions, there is a  
365 conserved ~1:1 relationship between *Orco* and total *Or* transcripts (47, 48).  
366 Interestingly, we see that ectopic *AgOr2* expression does not change *Orco* expression  
367 (**Fig. 4b**), skewing the ratio in experimental conditions to 1:3. We predict this skewed  
368 OR expression in a neuron causes major disruptions at the level of the AgOR2:ORCO  
369 protein complex. This may result in a trafficking defect in which AgOR2:ORCO  
370 complexes do not migrate to the cell surface. Since *Orco* is required to traffic OR:ORCO  
371 complexes to the dendritic surfaces (43), increasing AgOR2 expression might interfere  
372 with this process. Alternatively, changes to the OR:ORCO stoichiometry might result in  
373 a functional defect in the channel itself, whereby the malformed complexes cannot  
374 respond to odors even if they have been successfully trafficked to the membrane.

375           This study adds to the mounting evidence that the disruption of a single sensory  
376 modality is insufficient to completely eliminate host-seeking behavior in mosquitoes. As  
377 first demonstrated in *Aedes aegypti*, mosquitoes with a mutation in the *Orco* gene  
378 remain attracted to humans (4); similarly, we find that *Anopheles* mosquitoes with  
379 impaired ORCO neuronal function continue to host-seek (**Fig. 5a-c**). In addition to  
380 odors, mosquitoes are attracted to a wide variety of human-derived cues, including heat,  
381 CO<sub>2</sub>, visual stimuli, and moisture; and so one sensory modality is likely able to  
382 compensate for the loss of another (4, 24, 49, 50).

383           Our study uncovers the existence of a mechanism of *Or* regulation in insects  
384 whereby expression of an OR protein results in the downregulation of other native *Or*  
385 gene isoforms (**Fig. 5d**). This work lays the foundation to explore specific cellular  
386 mechanisms utilized by mosquito olfactory receptor neurons to regulate *Or* expression.  
387 A mechanism of OR regulation in mosquitoes may also be a target for vector-control  
388 strategies to alleviate the spread of vector-borne diseases.

389

## 390 **METHODS**

391 **Insect stocks.** *Mosquitoes.* *Orco-QF2* and *QUAS-mCD8::GFP* transgenic mosquito  
392 stocks were generated as described in Riabinina et al. 2016 (6). *QUAS-GCaMP6f* was  
393 generated as described in Afify et al. 2019 (51). Wild-type Ngousso mosquitoes were a  
394 gift from the Insect Transformation Facility (Rockville, MD). *Flies.* *Orco-GAL4* (#26818)  
395 and *5xUAS-AgOr2* (#58828) lines were obtained from the Bloomington *Drosophila*  
396 Stock Center.

397 **Recombinant DNA construction.** Plasmids were constructed by enzyme digestions,  
398 PCR, subcloning and the In-Fusion HD Cloning System (Clontech, catalogue number  
399 639645). Plasmid inserts were verified by restriction enzyme digests and DNA  
400 sequencing. Insertions of each plasmid into the *Anopheles* genome (*QUAS-AgOr2*,  
401 *QUAS-mutAgOr2*) or the *Drosophila* genome (*20xUAS-AgOr2*) were verified by  
402 sequencing the vector-specific cassette within the transgenic animal.

403 To create the *pXL-BacII-15xQUAS-TATA-AgOr2-Sv40* reporter line, we  
404 linearized the *pXL-BacII-15xQUAS\_TATA-Sv40* (6) vector with *XhoI*. The cDNA of  
405 *AgOr2* was amplified from Bloomington stock number 58828 using the oligos  
406 *Aga\_OR2\_F* (5'-ATTCGTTAACAGATCTATGCTGATCGAAGAGTGTCCGA-3') and  
407 *Aga\_OR2\_R* (5'- CCTTCACAAAGATCGACGTCTTAGTTGTACACTCGGCGCAGC-3').  
408 The resultant PCR product was then infusion-subcloned back into the construct. To  
409 create the *pXL-BacII-15xQUAS-TATA-mutAgOr2-Sv40* reporter line, we did a double  
410 digest of *pXL-BacII-15xQUAS-TATA-AgOr2-Sv40* with *BglII* and *XhoI*. We then  
411 amplified *AgOr2* from *pXL-BacII-15xQUAS-TATA-AgOr2-Sv40* using a forward primer  
412 that mutated the start codon: ATG→TTT (*InfuMUTAgOr2\_for*: 5'-  
413 ATTCGTTAACAGATCTTTTCTGATCGAAGAGTGTCCGATAATTG). We also  
414 engineered the reverse primer to create a frameshift mutation at a second in-frame ATG  
415 site located between the first and second transmembrane domains of *AgOr2*  
416 (*InfuMUTAGOr2\_rev*: 5'- CGTCATTTTTCTCGAGTAGAGAGCGTACTCGGCGGC-3').

417 The *20xUAS-AgOr2* reporter was created in *Drosophila* to test whether  
418 increasing the dosage of *AgOr2* affects olfactory physiology. The construct was made  
419 by digesting *pJFRC-20xUAS-IVS-CD8GFP* with *NotI* and *XbaI* and isolating the

420 linearized 8.1kb vector. *AgOr2* was PCR amplified from *pXL-BacII-15xQUAS-TATA-*  
421 *AgOr2-Sv40* using the primers *UAS-AgOr2-FOR* (5'-TTACTTCAGGCGGCC  
422 GCAAA ATGCTGATCGAAGAGTGTC CG) and *UAS-AgOR2-REV* (5'-  
423 ACAAAGATCCTCTAGA TTAGTTGTACTCTCGGCGCAG-3'). The PCR product was  
424 infusion cloned into the digested *pJRFRC-20xQUAS* vector. Upon sequence  
425 confirmation, the plasmid was midipreped (Qiagen 12145) and sent to Rainbow  
426 Transgenics for injection into the attP site (RFT # 8622).

427 The *pXL-BACII-DsRed-OR7\_9kbProm-QF2-hsp70* construct was used by the  
428 *Orco-QF2* driver line in this study. Construction of this plasmid is described in Riabinina  
429 et al. 2016 (6).

430

431 ***Anopheles gambiae* transgenics.** *Anopheles gambiae* M-form strain Ngousso (the M-  
432 form of *An. gambiae* is now referred to as *Anopheles coluzzii*) mosquitoes were grown  
433 at 28°C, 70-75% relative humidity, 12h light/dark cycle. Freshly deposited eggs were  
434 collected by providing mated, gravid females with wet filter paper as an oviposition  
435 substrate for 15-20min, after which the eggs were collected and systematically arranged  
436 side-by-side on a double-sided tape fixed to a coverslip. Aligned embryos were covered  
437 with halocarbon oil (Sigma, series 27) and injected at their posterior pole with an  
438 injection cocktail between 30-40min after egg laying. Injection cocktails consisted of a  
439 mixture of two plasmids, one with a piggyBac vector carrying the transgene of interest  
440 with a dominant visible marker gene – enhanced cyan fluorescent protein (ECFP) –  
441 under the regulatory control of the *3xP3* promoter, and a piggyBac transposase-  
442 expressing plasmid consisting of the transposase open reading frame under the

443 regulatory control of the promoter from the *An. stephensi vasa* gene. Vector  
444 concentrations were at 150ng/uL and the transposase-expressing plasmid was at  
445 300ng/uL in 5mM KCL, 0.1mM sodium phosphate pH 6.8. Halocarbon oil was  
446 immediately removed and coverslips with injected embryos were placed in trays of  
447 water at 28°C, where the first instar larvae hatched ~24hr later. The Insect  
448 Transformation Facility (<https://www.ibbr.umd.edu/facilities/itf>) within the University of  
449 Maryland College Park's Institute for Bioscience and Biotechnology Research  
450 performed all embryo microinjections. Adults developing from injected embryos were  
451 separated by sex at the pupal stage before mating, and small groups of 5-10 injected  
452 adult males or females were crossed to wild-type Ngousso adults of the opposite sex.  
453 The progeny from these matings were screened during the third or fourth larval instar  
454 for the presence of vector-specific marker gene expression. Transgenic larvae were  
455 saved and adults from these larvae were outcrossed to wild-type for a total of 5  
456 generations.

457

458 **Insect stock maintenance.** *Anopheles gambiae*. *Anopheles* mosquitoes were grown at  
459 28°C, 70-75% relative humidity and 14hr light/10hr dark cycle. Larvae were reared at low  
460 densities (175 larvae/1L dH<sub>2</sub>O) to ensure large adult size. They were provided with  
461 TetraMin Tropical Flakes and Purina Cat Chow Indoor pellets *ad libitum*. Pupae were  
462 hand collected and allowed to eclose in small cages, where they were provided with  
463 10% sucrose continuously. Almost all pupae eclosed the day after collection. Adult  
464 males and females were kept together in the same cage for 7-10 days, after which they  
465 were fed mouse blood from anaesthetized mice according to Johns Hopkins University

466 Animal Care and Use Committee (ACUC) approved protocol #M019M483. Eggs were  
467 collected from the resulting gravid females by providing them with a cup of water  
468 containing wet filter paper on which to deposit their eggs as an oviposition substrate.  
469 Each generation was screened for the presence of the eye specific marker encoded by  
470 the inserted plasmid cassette. *Drosophila melanogaster*. Flies were reared at 25°C and  
471 70% humidity on a standard cornmeal diet.

472

473 **Calcium imaging. Preparation.** *In vivo* preparation of mosquitoes (ages 3-10 days) and  
474 optical imaging of odor-evoked calcium responses are described in Afify et al. 2019  
475 (51). **Genotyping mosquitoes.** After the recordings were made for each sample, we  
476 froze the bodies of all mosquitoes for subsequent gDNA extraction and genotyping. At  
477 the time of the experiment, our transgenic lines were not homozygous. Because all  
478 *QUAS* effector lines (*QUAS-AgOr2*, *QUAS-mutAgOr2*, *QUAS-GCaMP6f*) are marked  
479 with the dominant eye marker, ECFP, we had to determine – for each sample – whether  
480 the mosquito contained a single copy of *QUAS-AgOr2*, a single copy of *QUAS-*  
481 *GCaMP6f*, or both *QUAS-AgOr2* and *QUAS-GCaMP6f* transgenes (for experiments in  
482 **Fig. 2 and S1-2**). For the experiment in **Fig. 3**, we had to determine – for each sample –  
483 whether the mosquito contained a single copy of *QUAS-mutAgOr2*, a single copy of  
484 *QUAS-GCaMP6f*, or both *QUAS-mutAgOr2* and *QUAS-GCaMP6f* transgenes. To  
485 genotype *QUAS-GCaMP6f*, we used the primers *gcamp6f\_for2* (5'-  
486 ATGGTATGGCTAGCATGACTG-3') and *gcamp6f\_rev* (5'-  
487 GTAGTTTACCTGACCATCCCC-3'). Females that did not have any amplification of  
488 *GCaMP6f* were discarded from the analysis. To genotype *QUAS-AgOr2* or *QUAS-*

489 *mutAgOr2*, we used the following primers: *AgOr2\_for1* (5'-  
490 TAATTGGTGTCAATGTGCGAG-3') and *AgOr2\_rev2* (5'-  
491 TTATCGGCTCCTCAAAGTCTG-3'). The PCR was designed so that both the wild-type  
492 *AgOr2* (1542bp) and the transgenic *AgOr2* (966bp) (or *mutAgOr2*; 968bp) – if present –  
493 would amplify. For each female, we determined whether she contained the wild-type  
494 and transgenic copy of *AgOr2* (or *mutAgOr2*) or only the wild-type *AgOr2*. Scoring of all  
495 calcium imaging files was done blind to genotype. *Analysis*. To make the heatmaps  
496 ( $\Delta F$ ), Fiji software (52) was used with a custom-built macro. This Macro uses the “Image  
497 stabilizer” plug-in to correct for movements in the recording, followed by the “Z project”  
498 function to calculate the mean baseline fluorescence (mean intensity in the first 9s of  
499 recording, before stimulus delivery). The “Image calculator” function was used to  
500 subtract the mean baseline fluorescence from the image of maximum fluorescence after  
501 odorant delivery (this image was manually chosen). Afterward, this  $\Delta F$  image was used  
502 to produce heatmaps. To quantify the  $\Delta F$  value for each segment to each odor, the “ROI  
503 manager” tool in Fiji was used to manually select an ROI. For each sample, we  
504 manually drew the ‘antennal ROI’ around the 11th antennal segment from an  
505 epifluorescent image taken for each sample prior to the calcium imaging. We also drew  
506 a ‘background ROI’ outside of the tissue using the same surface area as the ‘antennal  
507 ROI’ to control for any background signal. A “task manager” was used to store the  
508 location of the antennal ROI and the background, and the mean intensity across the  
509 antennal segment (or background control) for each odor was stored for each ROI. The  
510 final  $\Delta F$  value was taken for each antennal segment and each odor as the mean  
511 intensity of the ‘antennal ROI’ minus the ‘background ROI.’ Of note, the imaging

512 software was upgraded for **Fig. 3**, which explains why the ( $\Delta F$ ) values in **Fig. 3** are on a  
513 different scale than **Fig. 2**, **Fig S1**, and **Fig. S2**. Data were analyzed using JMP Version  
514 9, SAS Institute Inc., Cary, NC, 1989-2019.

515

516 **Single Sensillum Recordings (SSR).** *Drosophila preparation.* Flies were housed on  
517 regular food in groups of a maximum of 10. Analysis was done on ab1 sensilla from 6-  
518 10 day old male flies. Sensilla of targeted ORNs were prepared and identified using  
519 methods described in Lin & Potter 2015 (53). Briefly, ab1 sensilla were identified by  
520 their response to CO<sub>2</sub>. Ab1 is the only sensillar group that houses the CO<sub>2</sub>-responsive  
521 neuron, and so a CO<sub>2</sub>-response was indicative that the sensillum we were recording  
522 from was ab1. Signals were amplified 100X (USB-IDAC System; Syntech, Hilversum,  
523 The Netherlands), inputted into a computer via a 16-bit analog-digital converter and  
524 analyzed off-line with AUTOSPIKE software (USB-IDAC System; Syntech). The low  
525 cutoff filter setting was 50Hz, and the high cutoff was 5kHz. To deliver odors or CO<sub>2</sub> to  
526 ab1, a constant air stream was guided through a serological pipette with a tip placed  
527 1cm from the antennae. The chemical cartridge was laterally inserted into this airflow.  
528 Stimuli consisted of 1000ms air pulses passed over odorant sources, which were  
529 various odorants diluted in paraffin oil (30 $\mu$ L on a filter paper of 1x2cm). For the  
530 benzaldehyde analysis, we counted every spike (did not distinguish among neuron  
531 subtypes). For the methyl salicylate analysis, we only included the response from the  
532 DmOR10a-positive neuron. Delta spikes/second were calculated by manually counting  
533 the number of spikes in a 0.5s window at stimulus delivery (200ms after stimulus onset  
534 to account for the delay due to the air path) and then subtracting the number of



535 spontaneous spikes in a 0.5s window before stimulation, multiplied by 2 to obtain delta  
536 spikes per second. *Mosquito preparation*. Mated females were 5-12 days old and not  
537 bloodfed. Extracellular recordings of the capitata pegs on the maxillary palps were  
538 made using the same equipment as for *Drosophila* SSR (see above). Cp sensilla were  
539 also identified by their response to CO<sub>2</sub>. Cp is the only sensillum that houses the CO<sub>2</sub>-  
540 responsive neuron, and so a CO<sub>2</sub>-response was indicative that the sensillum we were  
541 recording from was cp. SSR data were analyzed using JMP Version 9, SAS Institute  
542 Inc., Cary, NC, 1989-2019.

543

544 **RNA-seq.** To generate experimental pools of *Orco>AgOr2* antennae, mosquitoes of the  
545 genotype *QUAS-AgOr2* were crossed to *Orco-QF2*. Simultaneously, we generated  
546 control samples by crossing our *Orco>AgOr2* or *Orco-QF2* strains to wild-type (2  
547 crosses). All 3 crosses were conducted in large breeding cages that consisted of ~75  
548 males and ~75 females. Crosses were blood-fed a total of 4 times and progeny from  
549 each cross were screened for the eye-specific fluorescent markers. Larvae generated  
550 from experimental crosses were screened for the presence of ECFP and DsRed,  
551 markers for the *QUAS* and the *Orco-QF2* transgenes, respectively. Larvae that did not  
552 contain both markers were discarded. For the control larvae progeny, animals that  
553 contained a single eye marker (either DsRed or ECFP, respectively) were kept in  
554 control pools that consisted either of *Orco-QF2* or *QUAS-AgOr2* alone. All mosquitoes  
555 used in this study were heterozygous for a given transgene. *Orco>mutAgOr2* and  
556 *QUAS-mutAgOr2* library preparations were made using the procedure described above  
557 with the exception that the antennae were extracted at a different time. To prepare

558 antennal RNA-seq libraries, we isolated RNA from approximately 200 antennae from  
559 age-matched cohorts (11 total samples: 3 experimental samples containing  
560 *Orco>AgOr2* antennae (*orco-QF2* + *QUAS-AgOr2*), 5 control samples consisting of 2  
561 samples from *Orco-QF2* antennae, 2 samples from *QUAS-AgOr2* antennae, and 1  
562 sample from *QUAS-mutAgOr2* antennae, and 3 experimental samples containing  
563 *Orco>mutAgOr2* antennae). These mated females were within their fertile period (5-20  
564 days old) and did not receive a bloodmeal.

565         To create the antennal RNA-seq libraries, we removed the whole antennae from  
566 the base of the pedicel and isolated total RNA using TriZol purification methods. The  
567 tissues were disrupted and homogenized using a power pestle with disposable RNase  
568 free pestles. Total RNA samples were stored at -80°C and shipped to Genewiz Inc,  
569 where they were first assessed for quantity (Qubit Quantification) and quality (Agilent  
570 2100 Bioanalyzer). RNA library preparation with polyA selection was then carried out  
571 using the *Illumina* HiSeq with a 2x150bp configuration. Paired end reads were  
572 pseudoaligned to the AgamP4.12 reference transcriptome (7) and isoform-level  
573 abundances were quantified using kallisto v0.46.0 (54) using default parameters with  
574 the following exceptions: `-t4` and `-b100`. Per-sample abundances were aggregated  
575 and normalized in R using sleuth v0.30.0 (55). For each pairwise comparison (*AgOr2* v  
576 control, *mutAgOr2* v control, and *mutAgOr2* v *AgOr2*), we fit a full sleuth model using  
577 condition as an explanatory variable. Differentially expressed isoforms were identified  
578 using the Wald test ( $q \leq 0.01$ , Benjamini-Hochberg corrected) for each model fit. Ternary  
579 plots were constructed using the ggtern R package (56).

580           The RNA-seq raw reads and dataset analyses are available from NCBI. The  
581 accession numbers are: (TBD)

582

583 **Immunohistochemistry Brains.** Brains of female mosquitoes of *Orco>mCD8::GFP* and  
584 *Orco>AgOr2,mCD8::GFP* genotypes were extracted and stained as described  
585 previously (6). Once genotyped via a PCR designed to amplify the transgenic and wild-  
586 type copies of *AgOr2* (see 'Calcium imaging section' above), experimental and control  
587 brains were separated and stained in two different groups. Rat anti-CD8 (Invitrogen  
588 #MCD0800, 1:100) was used to visualize the ORN projections to the antennal lobes and  
589 mouse nc82 (DSHB, 1:50) was added to visualize the structure of the brain. *Pupal*  
590 *Antennae.* *Orco>mCD8::GFP* larvae were collected in 2 trays, each of which contained  
591 ~60 larvae. At the given timepoint After Puparium Formation (APF), the cephalothorax  
592 and abdomen of the pupae were extracted and the antennae, oculus, compound eye,  
593 and rudimentary appendages were placed in 4% paraformaldehyde (PFA) with 0.1%  
594 Triton Phosphate Buffer Solution (PBS-T). Antennae were then dissected out and  
595 washed 3x in 1X PBS-T (0.1%). Antennae were then blocked for 30min at 4°C with 5%  
596 Normal Goat Serum (NGS).

597           To visualize mCD8::GFP expression, we added rat anti-CD8 (Invitrogen  
598 #MCD0800, 1:100), which was left to incubate on a rotator overnight at 4°C. The next  
599 day, antennae were washed 3x in 1X PBS-T (0.1%) and Alexa-488 goat anti-rat  
600 (Invitrogen A110066, 1:200) was added to the solution. After 1.5hr at 25°C, antennae  
601 were washed 2X in 1X PBS-T (0.1%) and the last wash in 1xPBS to remove the triton.

602 Antennae were placed on slides and mounted in Slow Fade Gold medium  
603 (ThermoFisher Scientific #S36936).

604

605 **Confocal imaging and analyses.** Brains and pupal antennae were imaged on an LSM  
606 700 Zeiss confocal microscope at 512x512 pixel resolution, with 0.96 or 2.37 $\mu$ M Z-  
607 steps. For illustration purposes, confocal images were processed using Fiji (52) to  
608 collapse the maximum intensity projection of Z-stacks into a single image. We used  
609 cells that were immunoreactive to mCD8 as a proxy for ORCO expression. Cells were  
610 counted manually.

611

612 **Host-proximity assay.** The design and methods of the host-proximity assay are  
613 modified from DeGennaro et al. 2013 (4). Briefly, for each trial, 20-30 adult female  
614 *Anopheles* mosquitoes (5+ days post eclosion, mated but not blood-fed) were sorted  
615 under cold anesthesia (4°C), placed in 24-oz deli containers  
616 ([https://www.amazon.com/gp/product/B00NB9WCEO/ref=oh\\_aui\\_detailpage\\_o06\\_s00?ie=UTF8&psc=1](https://www.amazon.com/gp/product/B00NB9WCEO/ref=oh_aui_detailpage_o06_s00?ie=UTF8&psc=1)), and fasted with access to water for 16-24hr prior to assaying. Pre-  
617 fasting and behavior experiments took place at 27°C and 70-80% relative humidity.  
618 Experiments took place after Zeitgeber Time 0 (ZT0) and continued until ZT8. 5  
619 minutes before the start of the assay, mosquitoes were released into a modified  
620 BugDorm (<https://shop.bugdorm.com/bugdorm-1-insect-rearing-cage-p-1.html>). After 5  
621 minutes had elapsed, pure CO<sub>2</sub> and synthetic air (air flow rate: 0.1L/min, CO<sub>2</sub> flowrate  
622 145MM) were mixed in an adaptor before being pulsed (3sec on: 3 sec off) into a flypad  
623 (8.1 x 11.6cm catalogue #59-114; Flystuff.com, San Diego, CA), which was placed at  
624

625 the bottom of the BugDorm. Mosquitoes were then presented with a single volunteer's  
626 arm, which was placed 2.5cm away from one side of the BugDorm so that mosquitoes  
627 could not come into direct contact with the arm. To control the distance from the arm to  
628 the cage, a Q-Snap needlework frame  
629 ([https://www.amazon.com/dp/B00013MV30/ref=twister\\_B07CQQJKL2?\\_encoding=UTF](https://www.amazon.com/dp/B00013MV30/ref=twister_B07CQQJKL2?_encoding=UTF8&pvc=1)  
630 [8&pvc=1](https://www.amazon.com/dp/B00013MV30/ref=twister_B07CQQJKL2?_encoding=UTF8&pvc=1)) was placed flush against the cage and the arm was pressed against the vials.  
631 The arm was elevated 2.7cm by placing it on a plastic microcentrifuge test-tube rack. An  
632 HDR-CX260V camera (Sony) was positioned to take images of mosquitoes responding  
633 to the human arm. Trials ran for 3 minutes. To quantify mosquito responses that came  
634 into 'close proximity' to the human arm, we counted the number of mosquitoes resting  
635 on the screen. We did not include mosquitoes that had landed on the white area  
636 surrounding the screen nor the mosquitoes that were in flight. For the % attraction  
637 figure, we scored the number of mosquitoes that came into close proximity of the arm  
638 every 10 seconds from minute 1 to minute 3 and then divided this number by the total  
639 number of mosquitoes in the trial. Data were analyzed using JMP Version 9, SAS  
640 Institute Inc., Cary, NC, 1989-2019.

641  
642 **Author Contributions:** S.E.M and C.J.P. designed research; S.E.M., A.A., and L.A.G.  
643 performed research; S.E.M. and L.A.G. analyzed data; and S.E.M. and C.J.P. wrote the  
644 paper.

645  
646 **Acknowledgments:** This research benefited from the limitless enthusiasm and support  
647 of Potter Lab members, both past and present. In particular, we would like to thank

648 Kateline Robinson Shaw and Liz Marr for assisting with molecular biology. Darya Task  
649 and Joanna Konopka helped rear the transgenic mosquitoes and improved the writing  
650 of the manuscript. We also thank Greg Artiushin for the graphic designs he made for the  
651 paper. This work was supported by grants from the National Institutes of Health to  
652 C.J.P. (NIAID R01AI137078), the Department of Defense to C.J.P. (W81XWH-17-  
653 PRMRP), and a Johns Hopkins Malaria Research Institute Postdoctoral Fellowship to  
654 SEM. We thank the Johns Hopkins Malaria Research Institute and Bloomberg  
655 Philanthropies for their support.

656

## 657 **REFERENCES**

658

- 659 1. Global Malaria Programme WG (2019) World malaria report 2019. ed WHO, p 232.
- 660 2. Cowman A, Healer J, Marapana D, & Marsh K (2016) Malaria: biology and disease.  
661 Cell 167(3):610-624.
- 662 3. Beauty B & Marquardt W (1996) The Biology of Disease Vectors (University Press of  
663 Colorado) 1 Ed.
- 664 4. DeGennaro M, et al. (2013) orco mutant mosquitoes lose strong preference for  
665 humans and are not repelled by volatile DEET. Nature 498(7455):487-491.
- 666 5. Butterwick J, et al. (2018) Cryo-EM structure of the insect olfactory receptor Orco.  
667 Nature 560.
- 668 6. Riabinina O, et al. (2016) Organization of olfactory centers in the malaria mosquito  
669 *Anopheles gambiae*. Nature Communications 7(13010).
- 670 7. VectorBase (Giraldo-Calderón et al 2015), *Anopheles gambiae* PEST, AgamP4.12.

- 671 8. Couto A, Alenius M, & Dickson B (2005) Molecular, Anatomical, and Functional  
672 Organization of the *Drosophila* Olfactory System. *Current Biology* 15(17):1535-1547.
- 673 9. Ghaninia M, Hansson B, & Ignell R (2007) The antennal lobe of the African malaria  
674 mosquito, *Anopheles gambiae* - innervation and three-dimensional reconstruction.  
675 *Arthropod Structure & Development* 36(1):23-39.
- 676 10. Bell J & Wilson R (2016) Behavior reveals selective summation and max pooling  
677 among olfactory processing channels. *Neuron* 91(2):425-438.
- 678 11. Clark J & Ray A (2016) Olfactory mechanisms for discovery of odorants to reduce  
679 insect-host contact. *Journal of Chemical Ecology* 42:919-930.
- 680 12. Jones P, Pask G, Rinker D, & Zwiebel L (2011) Functional agonism of insect  
681 odorant receptor ion channels. *Proceedings of the National Academy of Science USA*  
682 108(21):8821-8825.
- 683 13. Carey A & Carlson J (2011) Insect olfaction from model systems to disease control.  
684 *Proceedings of the National Academy of Science USA* 108(32):12987-12995.
- 685 14. Chin S, Maguire S, Huoviala P, Jefferis G, & Potter C (2018) Olfactory neurons and  
686 brain centers directing oviposition decisions in *Drosophila*. *Cell Reports* 24(6):1667-  
687 1678.
- 688 15. Riabinina O, et al. (2015) Improved and expanded Q-system reagents for genetic  
689 manipulations. *Nature Methods* 12(3):219-222.
- 690 16. Carey A, Wang G, Su C-Y, Zwiebel L, & Carlson J (2010) Odorant reception in the  
691 malaria mosquito *Anopheles gambiae*. *Nature* 464(7285):66-71.
- 692 17. Potter C & Luo L (2010) Splinkerette PCR for mapping transposable elements in  
693 *Drosophila*. *PLoS One* 5(4):e10168.

- 694 18. Dobritsa A, van der Goes van Naters W, Warr C, Steinbrecht A, & Carlson J (2003)  
695 Integrating the molecular and cellular basis of odor coding in the *Drosophila* antenna.  
696 *Neuron* 37(5):827-841.
- 697 19. Hallem E, Ho M, & Carlson J (2004) The molecular basis of odor coding in the  
698 *Drosophila* antenna. *Cell* 117(7):965-979.
- 699 20. Ray A, van der Goes van Naters W, Shiraiwa T, & Carlson J (2007) Mechanisms of  
700 odor receptor gene choice in *Drosophila*. *Neuron* 53:353-369.
- 701 21. Mysore K, Flister S, Müller P, Rodrigues V, & Reichert H (2011) Brain development  
702 in the yellow fever mosquito *Aedes aegypti*: a comparative immunocytochemical  
703 analysis using cross-reacting antibodies from *Drosophila melanogaster*. *Developmental*  
704 *Genes and Evolution* 221:281-296.
- 705 22. Mysore K, Flannery E, Tomchaney M, Severson D, & Duman-Scheel M (2013)  
706 Disruption of *Aedes aegypti* olfactory system development through Chitosan/siRNA  
707 nanoparticle targeting of semaphorin-1a. *PLoS Neglected Tropical Diseases* 7(5):e2215.
- 708 23. Mysore K, Andrews E, Li P, & Duman-Scheel (2014) Chitosan/siRNA nanoparticle  
709 targeting demonstrates a requirement for single-minded during larval and pupal  
710 olfactory system development of the vector mosquito *Aedes aegypti*. *BMC*  
711 *Developmental Biology* 14(9).
- 712 24. Raji J, et al. (2019) *Aedes aegypti* mosquitoes detect acidic volatiles found in human  
713 odor using the IR8a pathway. *Current Biology* 29:1253-1262.
- 714 25. Serizawa S, et al. (2003) Negative feedback regulation ensures the one receptor-  
715 one olfactory neuron rule in mouse. *Science* 302(5653):2088-2094.



- 716 26. Feinstein P, Bozza T, Rodriguez I, Vassalli A, & Mombaerts P (2004) Axon  
717 guidance of mouse olfactory sensory neurons by odorant receptors and the  $\beta 2$   
718 adrenergic receptor. *Cell* 117.
- 719 27. Lewcock J & Reed R (2004) A feedback mechanism regulates monoallelic odorant  
720 receptor expression. *Proceedings of the National Academy of Science USA*  
721 101(4):1069-1074.
- 722 28. Shykind B, et al. (2004) Gene switching and the stability of odorant receptor gene  
723 choice. *Cell* 117(6):801-815.
- 724 29. Dalton R, Lyons D, & Lomvardas S (2013) Co-opting the unfolded protein response  
725 to elicit olfactory receptor feedback. *Cell* 155:321-332.
- 726 30. Vassar R, et al. (1994) Topographic organization of sensory projections to the  
727 olfactory bulb. *Cell* 79.
- 728 31. Mombaerts P, et al. (1996) Visualizing an olfactory sensory map. *Cell* 87:675-686.
- 729 32. Wang F, Nemes A, Mendelsohn M, & Axel R (1998) Odorant receptors govern the  
730 formation of a precise topographic map. *Cell* 93:47-60.
- 731 33. Clowney E, et al. (2012) Nuclear aggregation of olfactory receptor genes governs  
732 their monogenic expression. *Cell* 151(4):724-737.
- 733 34. Omondi A, Ghaninia M, Dawit M, Svensson T, & Ignell R (2019) Age-dependent  
734 regulation of host seeking in *Anopheles coluzzii*. *Scientific Reports* 9(9699).
- 735 35. Foster W & Takken W (2004) Nectar-related vs. human-related volatiles:  
736 behavioural response and choice by female and male *Anopheles gambiae*  
737 (Diptera:Culicidae) between emergence and first feeding. *Bulletin of Entomological*  
738 *Research* 94:145-157.

- 739 36. Tallon A, Hill S, & Ignell R (2019) Sex and age modulate antennal chemosensory-  
740 related genes linked to the onset of host seeking in the yellow-fever mosquito, *Aedes*  
741 *aegypti*. Scientific Reports 9(43).
- 742 37. Nguyen M, Zhou Z, Marks C, Ryba N, & Belluscio L (2007) Prominent roles for  
743 odorant receptor coding sequences in allelic exclusion. Cell 131(5):1009-1017.
- 744 38. Karner T, Kellner I, Schultze A, Breer H, & Krieger J (2015) Co-expression of six  
745 tightly clustered odorant receptor genes in the antenna of the malaria mosquito  
746 *Anopheles gambiae*. Frontiers in Ecology and Evolution 3(26).
- 747 39. Hill C, et al. (2002) G protein-coupled receptors in *Anopheles gambiae*. Science  
748 298.
- 749 40. Bohbot J, et al. (2007) Molecular characterization of the *Aedes aegypti* odorant  
750 receptor gene family. Insect Molecular Biology 16(5):525-537.
- 751 41. Zhang X, Rodriguez I, Mombaerts P, & Firestein S (2004) Odorant and vomeronasal  
752 receptor genes in two mouse genome assemblies. Genomics 83:802-811.
- 753 42. Sullivan S, Adamson M, Ressler K, Kozak C, & Buck L (1996) The chromosomal  
754 distribution of mouse odorant receptor genes. Proceedings of the National Academy of  
755 Science USA 93:884-888.
- 756 43. Benton R, Sachse S, Michnick S, & Vosshall L (2006) Atypical membrane topology  
757 and heteromeric function of *Drosophila* odorant receptors in vivo. PloS Biology 4(2):e20.
- 758 44. German P, van der Poel S, Carraher C, Kralicek A, & Newcomb R (2013) Insights  
759 into subunit interactions within the insect olfactory receptor complex using FRET. Insect  
760 Biochemistry and Molecular Biology 43(2):138-145.

- 761 45. Neuhaus E, et al. (2005) Odorant receptor heterodimerization in the olfactory  
762 system of *Drosophila melanogaster*. Nature Neuroscience 8(1):15-17.
- 763 46. Tsitoura P, et al. (2010) Expression and membrane topology of *Anopheles gambiae*  
764 odorant receptors in Lepidopteran Insect Cells. PloS One 5(11):e15428.
- 765 47. Athrey G, Cosme L, Popkin-Hall Z, Pathikonda W, & Slotman M (2017)  
766 Chemosensory gene expression in olfactory organs of the anthropophilic *Anopheles*  
767 *coluzzii* and zoophilic *Anopheles quadriannulatus*. BMC Genomics 18(1):751.
- 768 48. Pitts R, Rinker D, Jones P, Rokas A, & Zwiebel L (2011) Transcriptome profiling of  
769 chemosensory appendages in the malaria vector *Anopheles gambiae* reveals tissue-  
770 and sex-specific signatures of odor coding. BMC Genomics 12(271).
- 771 49. McMeniman C, Corfas R, Matthews B, Ritchie S, & Vosshall L (2014 ) Multimodal  
772 integration of carbon dioxide and other sensory cues drives mosquito attraction to  
773 humans. Cell 156:1060-1071.
- 774 50. Greppi C, et al. (2020) Mosquito heat seeking is driven by an ancestral cooling  
775 receptor. Science 367:681-684.
- 776 51. Afify A, Betz J, Riabinina O, Lahondère C, & Potter C (2019) Commonly used insect  
777 repellents hide human odors from *Anopheles* mosquitoes. Current Biology 29(21).
- 778 52. Schindelin J, et al. (2012) Fiji: an open-source platform for biological-image  
779 analysis. Nature Methods 9:676-682.
- 780 53. Lin C-C & Potter C (2015) Re-classification of *Drosophila melanogaster* trichoid and  
781 intermediate sensilla using fluorescence-guided single sensillum recording. PloS One.
- 782 54. Bray N, Pimentel H, Melsted P, & Pachter L (2016) Near-optimal probabilistic RNA-  
783 seq quantification. Nature Biotechnology 34(5).

- 784 55. Pimentel H, Bray N, Puente S, Melsted P, & Pachter L (2017) Differential analysis of  
785 RNA-Seq incorporating quantification uncertainty. *Nature Methods* 14:687-690.
- 786 56. Hamilton N & Ferry M (2018) ggtern: Ternary Diagrams Using ggplot2. *Journal of*  
787 *Statistical Software, Code Snippets* 87(3):1-17.

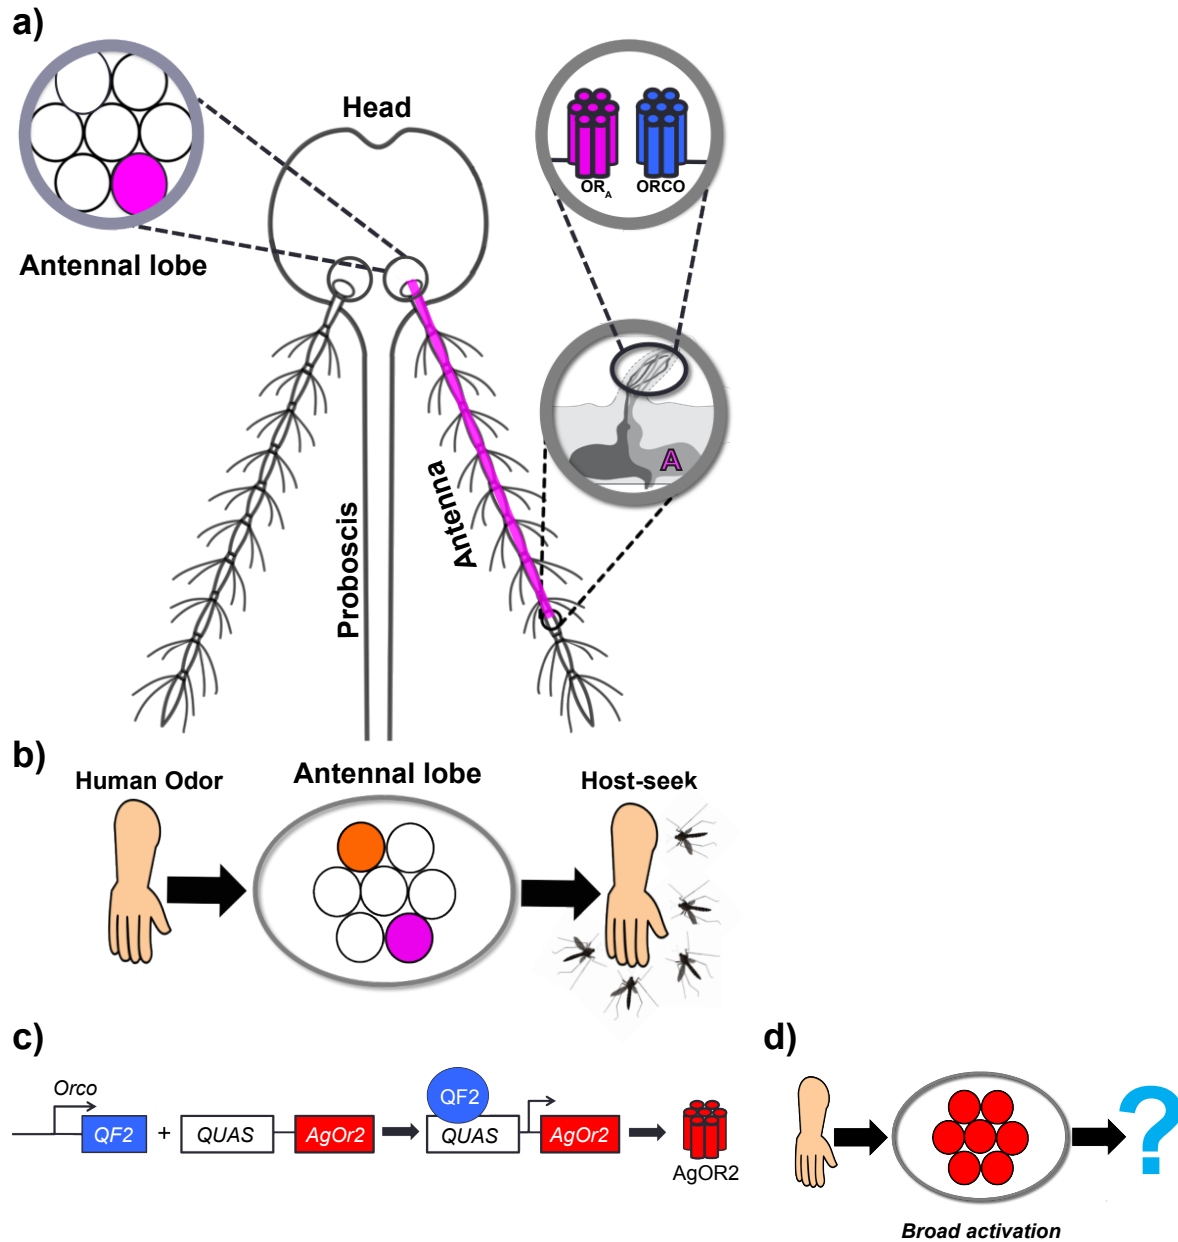

788 **Figure 1. Strategy to manipulate the olfactory system of *Anopheles* mosquitoes.**

789 **a) Anatomy of odorant receptor guided olfaction.** Mosquitoes smell odors in the

790 environment using three olfactory organs: the proboscis, the maxillary palps (not

791 shown), and the antennae. A single antenna is made up of 13 segments called

792 'flagellomeres.' Each flagellomere is covered with sensory hairs called 'sensilla,' a

793 single one of which houses up to 4 olfactory neurons. An olfactory neuron expresses 1  
794 of 3 chemosensory gene families: the *ionotropic receptors*, the *gustatory receptors*, or  
795 the *odorant receptors*. The *odorant receptor* gene family plays an important role in host-  
796 seeking behavior. There are 75 different ORs in the *Anopheles gambiae* genome, each  
797 of which is sensitive to specific odors in the environment. Only 1 OR (OR<sub>A</sub>) is expressed  
798 *per* olfactory receptor neuron (ORN, labeled 'A'). At the dendrites of ORN A, OR<sub>A</sub>  
799 couples with the obligate co-receptor, ORCO. When odor binds to OR<sub>A</sub>-ORCO  
800 complexes, ORN A becomes active and sends its excitatory signal down its axon,  
801 targeting a discrete brain region of the mosquito antennae lobe (AL) called a  
802 'glomerulus' (shown as a pink circle). **b) A human-specific odor code in the**  
803 **mosquito brain.** Human odors bind to specific ORs, activating the ORNs on which they  
804 are expressed. Activated ORNs target discrete glomeruli (pink, orange) in the AL to  
805 guide host-seeking. **c) Olfactogenetics strategy.** Using the Q-system, the *Orco-QF2*  
806 transgene (6) was combined with the effector construct, *QUAS-AgOr2*. The combination  
807 of these transgenes causes AgOR2 to be expressed in *Orco*-positive ORNs. **d) Test of**  
808 **the olfactogenetics strategy.** AgOR2 responds to major components of human odor  
809 such as indole and benzaldehyde. We hypothesized that *Orco>AgOr2* mosquitoes  
810 would experience broad activation of the majority of the AL in the presence a human,  
811 thereby dysregulating the human-specific odor code in the mosquito brain (**Fig. 1b**).  
812 *Orco>AgOr2* mosquitoes would then be evaluated on whether they showed reduced  
813 host-seeking behavior.

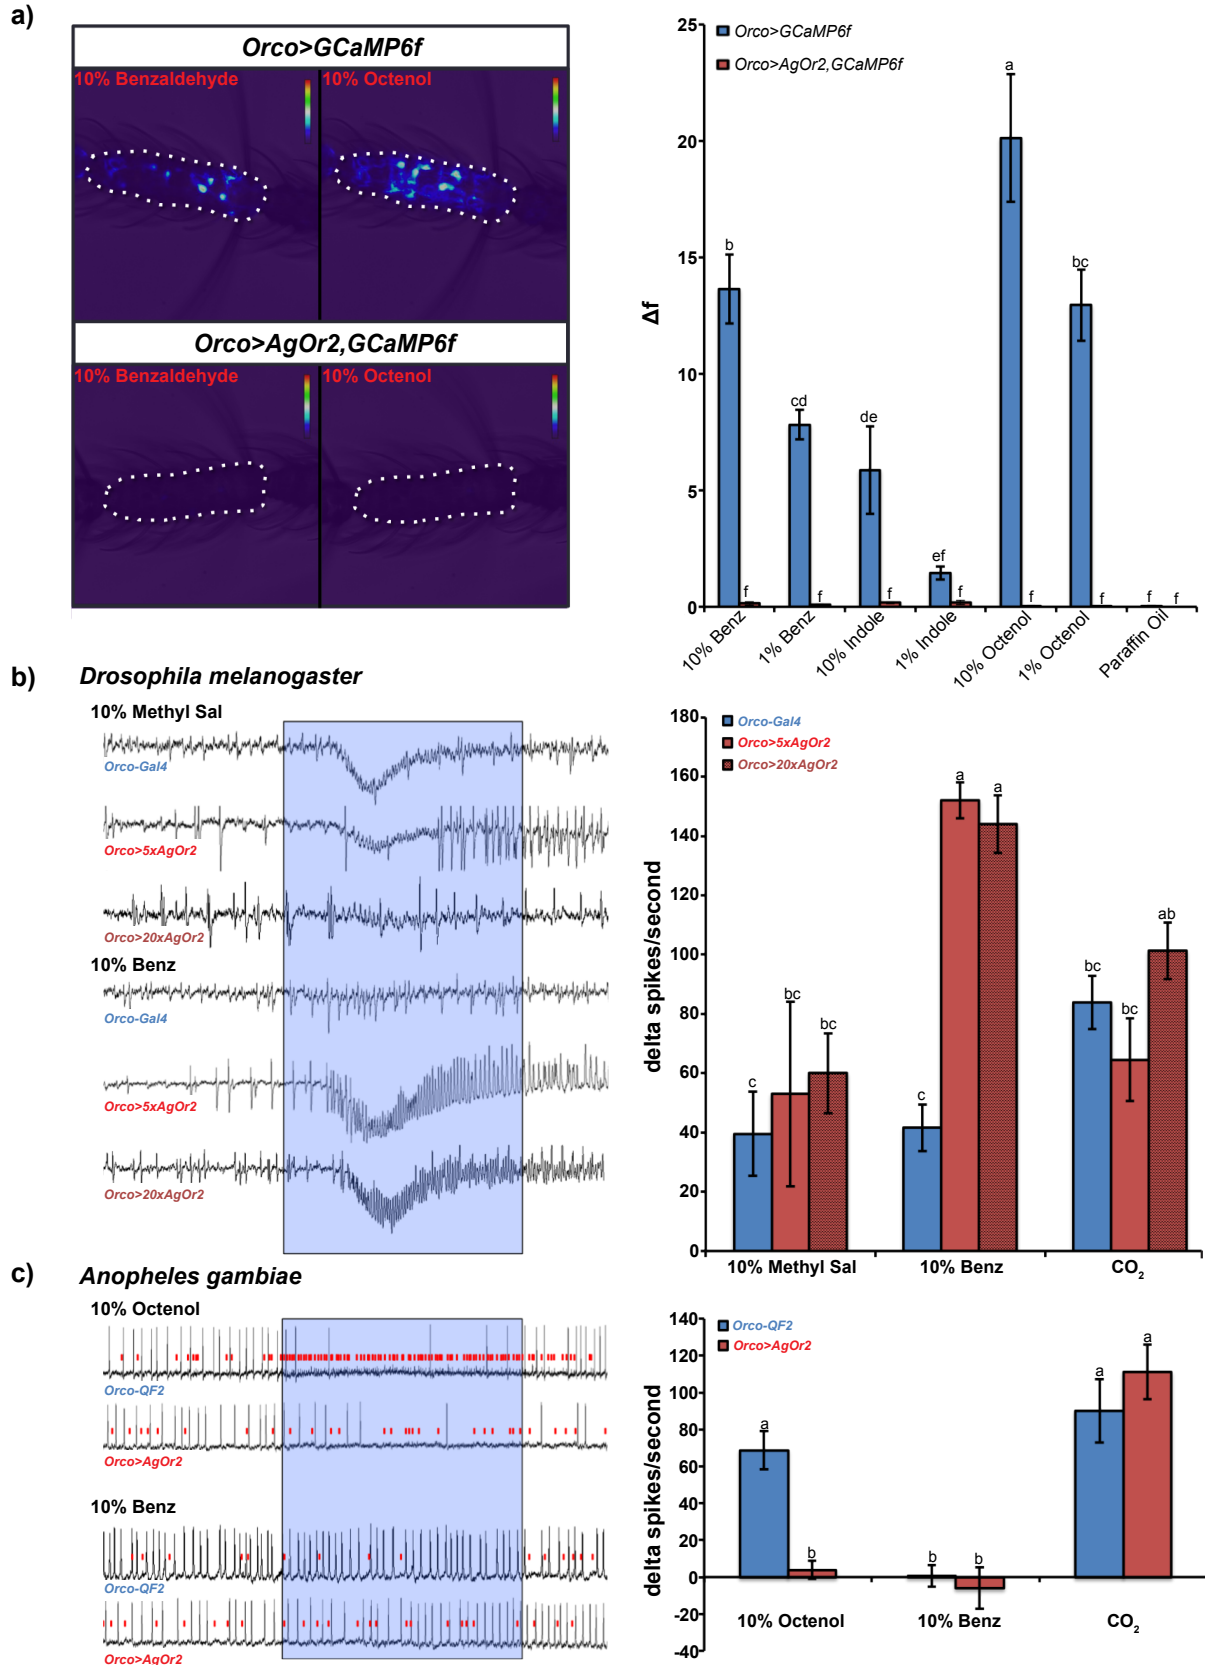

814 **Figure 2. Olfactogenetics impairs *Anopheles* but not *Drosophila* Orco-positive**  
815 **ORNs. a) *Orco>AgOr2,GCamp6f* mosquitoes show impaired olfactory responses**  
816 **to human odorants.** The activity of olfactory receptor neurons in antennal segment 11  
817 (outlined with a white dotted line) was detected by calcium imaging of Orco-positive  
818 neurons expressing *GCaMP6f* (51). Relative to controls (*Orco>GCaMP6f*), mosquito  
819 antennal segments with ectopic expression of *AgOr2* and *GCaMP6f*  
820 (*Orco>AgOr2,GCamp6f*) show impaired responses to benzaldehyde (10% and 1%) and  
821 indole (10%), the cognate ligands of AgOR2. They also show dampened responses to  
822 octenol (10% and 1%). A two-way repeated measures ANOVA was conducted to test  
823 the effect of odor and genotype on calcium responses. We found a significant effect at  
824 the  $p < 0.0001$  level. Groups with different letter values (a-f) are statistically different as  
825 determined by the Tukey post hoc HSD test. Each sample included in the analysis was  
826 taken from a different female mosquito.  $n_{Orco>GCaMP6f} = 9$ ,  $n_{Orco>AgOr2,GCamp6f} = 8$ . **b)**  
827 **Ectopic expression of *AgOr2* in *Drosophila* ab1 sensilla does not impair ORN**  
828 **physiology.** The cognate ligand of OR10a-expressing neurons is methyl salicylate  
829 (Methyl Sal). Driving *AgOr2* into this neuronal group using the *5xUAS* or *20xUAS*  
830 effector lines does not affect OR10a's response to Methyl Sal. Orco-positive ORNs of  
831 *Orco>5xAgOr2* and *Orco>20xAgOr2* animals show an ectopic response to  
832 benzaldehyde (Benz). The presence of the Orco-negative CO<sub>2</sub> neuron was used to  
833 verify that recordings were taken from the ab1 sensillum. The activity of the CO<sub>2</sub> neuron  
834 (trace not shown) is not affected by the experimental manipulation. Odor or CO<sub>2</sub>  
835 stimulus was delivered in the timeframe denoted by the blue translucent box. A two-way  
836 repeated measures ANOVA was used to determine significance of genotype and odor



837 on delta spikes/second at the  $p < 0.0001$  level. Groups with different letter values (a-c)  
838 are statistically different as determined by the Tukey post hoc HSD test. 2-3 Females  
839 *per* genotype were analyzed. The number of sensilla evaluated for each group:  $n_{Orco-$   
840  $GAL4} = 9$ ;  $n_{Orco > 5xAgOr2} = 4$ ;  $n_{Orco > 20xAgOr2} = 5$ . **c) Olfactogenetics impairs Orco-positive**  
841 **ORN physiology in *Anopheles*.** Single sensillum recordings from the *Anopheles*  
842 maxillary palp capitata peg sensilla. The cognate ligand of OR8-expressing neurons is  
843 octenol. Driving *AgOr2* into this neuron group interferes with OR8's response to octenol  
844 (smallest spiking neurons, red lines indicate OR8 activity). The ORNs ectopically  
845 expressing *AgOr2* do not respond to benzaldehyde (Benz). The presence of the *Orco-*  
846 negative CO<sub>2</sub> neuron was used to verify that recordings were taken from a cp sensillum.  
847 The activity of the CO<sub>2</sub> neuron (trace not shown) was not affected by the experimental  
848 manipulation. Odor or CO<sub>2</sub> was delivered in the timeframe denoted by the blue  
849 translucent box. A two-way repeated measures ANOVA was used to determine that  
850 there was a significant effect at the  $p < 0.005$  level of odor and genotype on delta  
851 spikes/second. Groups with different letter values (a-b) are statistically different as  
852 determined by the Tukey post doc HSD test. 2-3 Females *per* genotype were analyzed.  
853 The number of sensilla evaluated for each group:  $n_{Orco-QF2} = 6$ ;  $n_{Orco > AgOr2} = 5$ . Error bars  
854 represent the standard error (SEM).

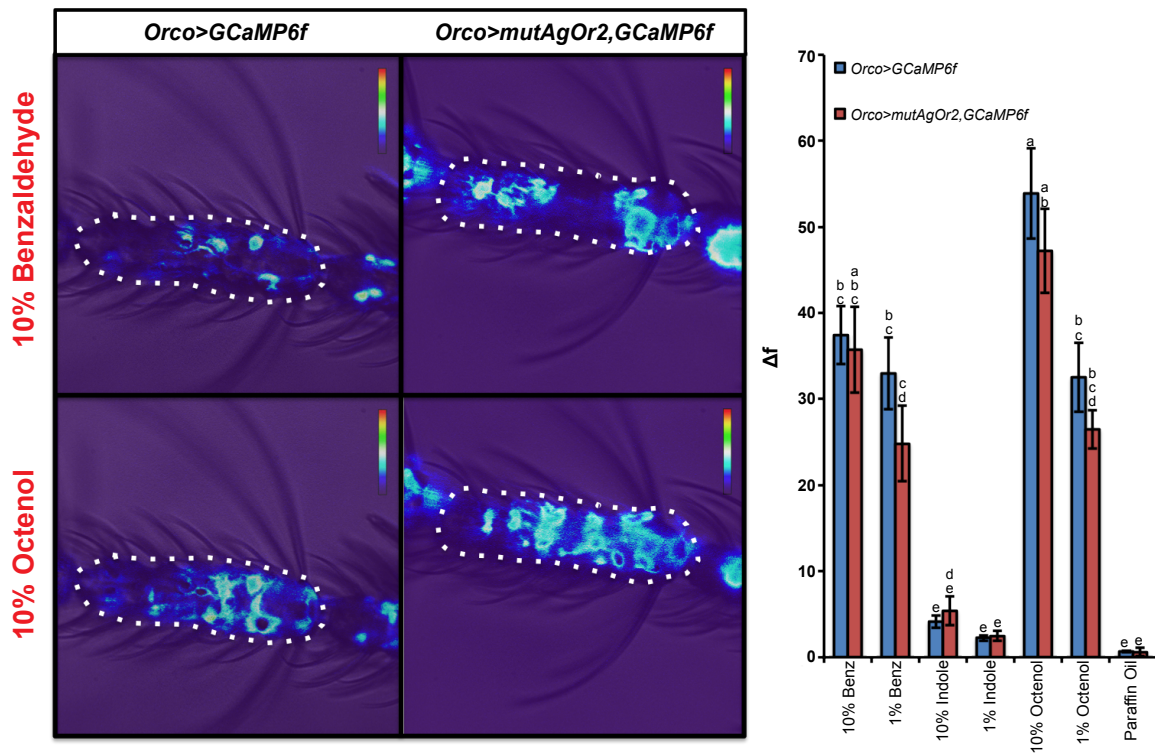

855 **Figure 3. AgOR2 protein is required for the dominant negative olfactory**  
856 **phenotype caused by *Orco>AgOr2* expression.** The *mutAgOR2* transgene contains  
857 an introduced point mutation in the start codon of *AgOr2* and a frameshift mutation at a  
858 second in-frame ATG site of the gene. Odor-evoked responses ( $\Delta f$ ) were calculated  
859 from the 11<sup>th</sup> segment of the mosquito antennae (outlined by dotted lines).  
860 Representative control and experimental calcium imaging responses to 10%  
861 benzaldehyde and 10% octenol are shown. Antennae from *Orco>mutAgOr2,GCaMP6f*  
862 mosquitoes show no difference in responses to odors from control (*Orco>GCaMP6f*). A  
863 two-way repeated measures ANOVA was used to determine that there was a significant  
864 effect at the  $p < 0.005$  level of odor and genotype on calcium responses. Groups with  
865 different letter values (a-d) are statistically different as determined by the Tukey post  
866 hoc HSD test. Error bars represent the standard error (SEM). Each sample included in

867 the analysis was taken from a different female mosquito.  $n_{Orco>GCaMP6f} = 11$ ,

868  $n_{Orco>mutAgOr2,GCaMP6f} = 5$ .

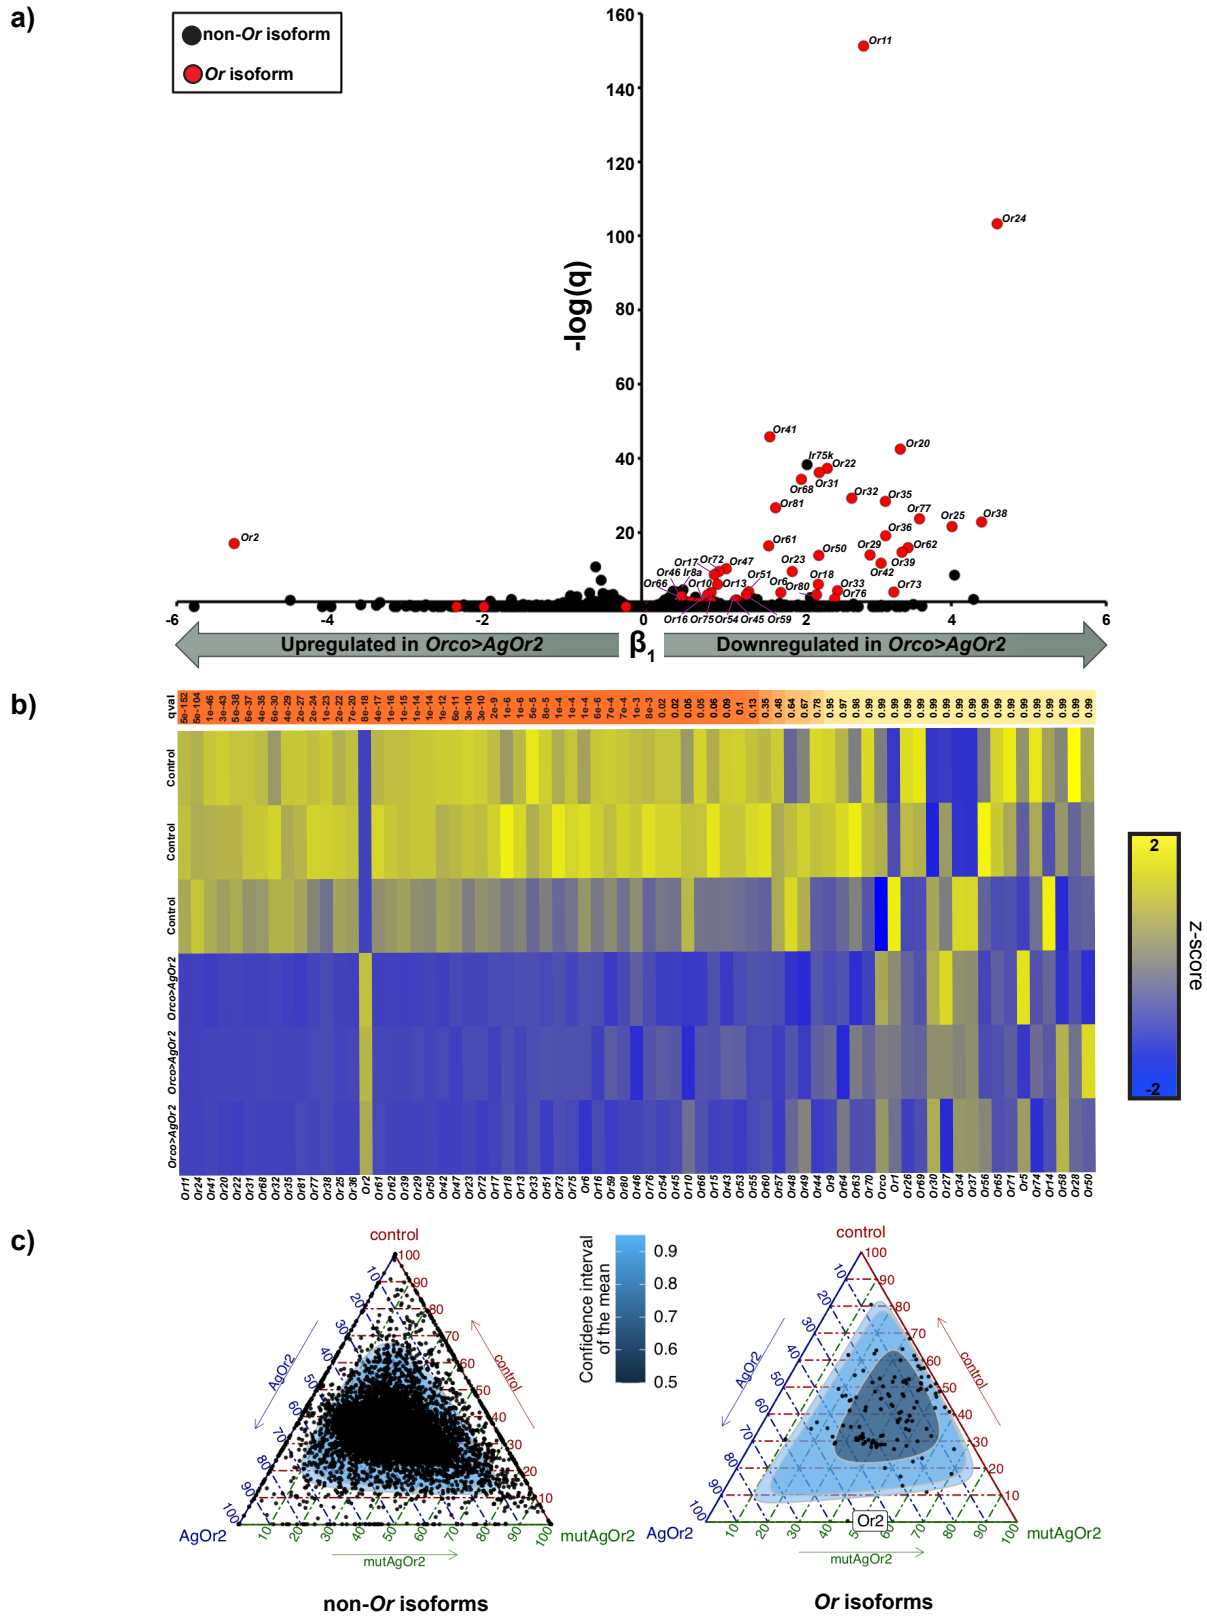

869 **Figure 4. Ectopic AgOR2 protein reduces the transcript levels of *Or* isoforms. a)**  
870 **Volcano plot of differentially expressed isoforms.** Using Wald tests, we evaluated  
871 whether the 13224 isoforms present in 3 triplicates of control and 3 triplicates of  
872 *Orco>AgOr2* antennae (~200 antennae *per* sample) were differentially expressed. *Non-*  
873 *odorant receptor* and *odorant receptor* isoforms are shown as black or red dots,  
874 respectively. Only 0.63% of the transcriptome is differentially regulated in *Orco>AgOr2*,  
875 where 49% of those transcripts are *Ors*.  $-\log(q)$  is the level of significance of  $\beta_1$ , which,  
876 for each isoform, is defined as  $\text{TPM}_{\text{control}} - \text{TPM}_{\text{experimental}}$ . The 41 *Ors* found significant  
877 from the Wald tests are labeled according to their gene annotation in the volcano plot.  
878 All *Ors* (with the exception of *AgOr2*) that are differentially expressed are downregulated  
879 in the experimental condition. Interestingly, *Ir8a* and *Ir75k* (indicated on the volcano  
880 plot) are downregulated in *Orco>AgOr2*. The remaining *Irs* and *Grs* are unaffected. **b)**  
881 **Heatmap of the *Or* gene family.** A z-score was computed for each cell in the heatmap  
882 by subtracting the mean isoform TPM from the cell's TPM divided by the standard  
883 deviation of the isoform TPM. *Ors* are sorted along the X-axis according to their  
884 significance level (q value) from the Wald tests in **a**. Darker orange is most significant,  
885 yellow is not significant. *Ors* are downregulated in *Orco>AgOr2* samples, with the  
886 exception of *AgOr2*, which is upregulated. **c) Ectopic AgOR2 protein is required for**  
887 **the observed downregulation of native *Or* transcripts.** Ternary plots were used to  
888 visualize the relative ratio of a genotype to an isoform's relative abundance level using  
889 the formula:  $(\text{TPM}_{\text{genotypeX}}) / (\text{mean TPM}_{\text{control}} + \text{mean TPM}_{\text{Orco>AgOr2}} + \text{mean}$   
890  $\text{TPM}_{\text{Orco>mutAgOr2}}) * 100$ . (left) There are equal ratios of transcript abundance levels for  
891 non-*Or* genes among the three genotypes (right). However, the relative contribution to

892 transcript abundance levels of control, *Orco>AgOr2*, and *Orco>mutAgOr2* are skewed  
893 in the *Or* gene family such that *Or* gene levels in *Orco>mutAgOr2* and control are  
894 relatively similar and higher than *Orco>AgOr2* levels, with the exception of *AgOr2* itself  
895 (whose abundance is similar between *Orco>AgOr2* and *Orco>mutAgOr2*).

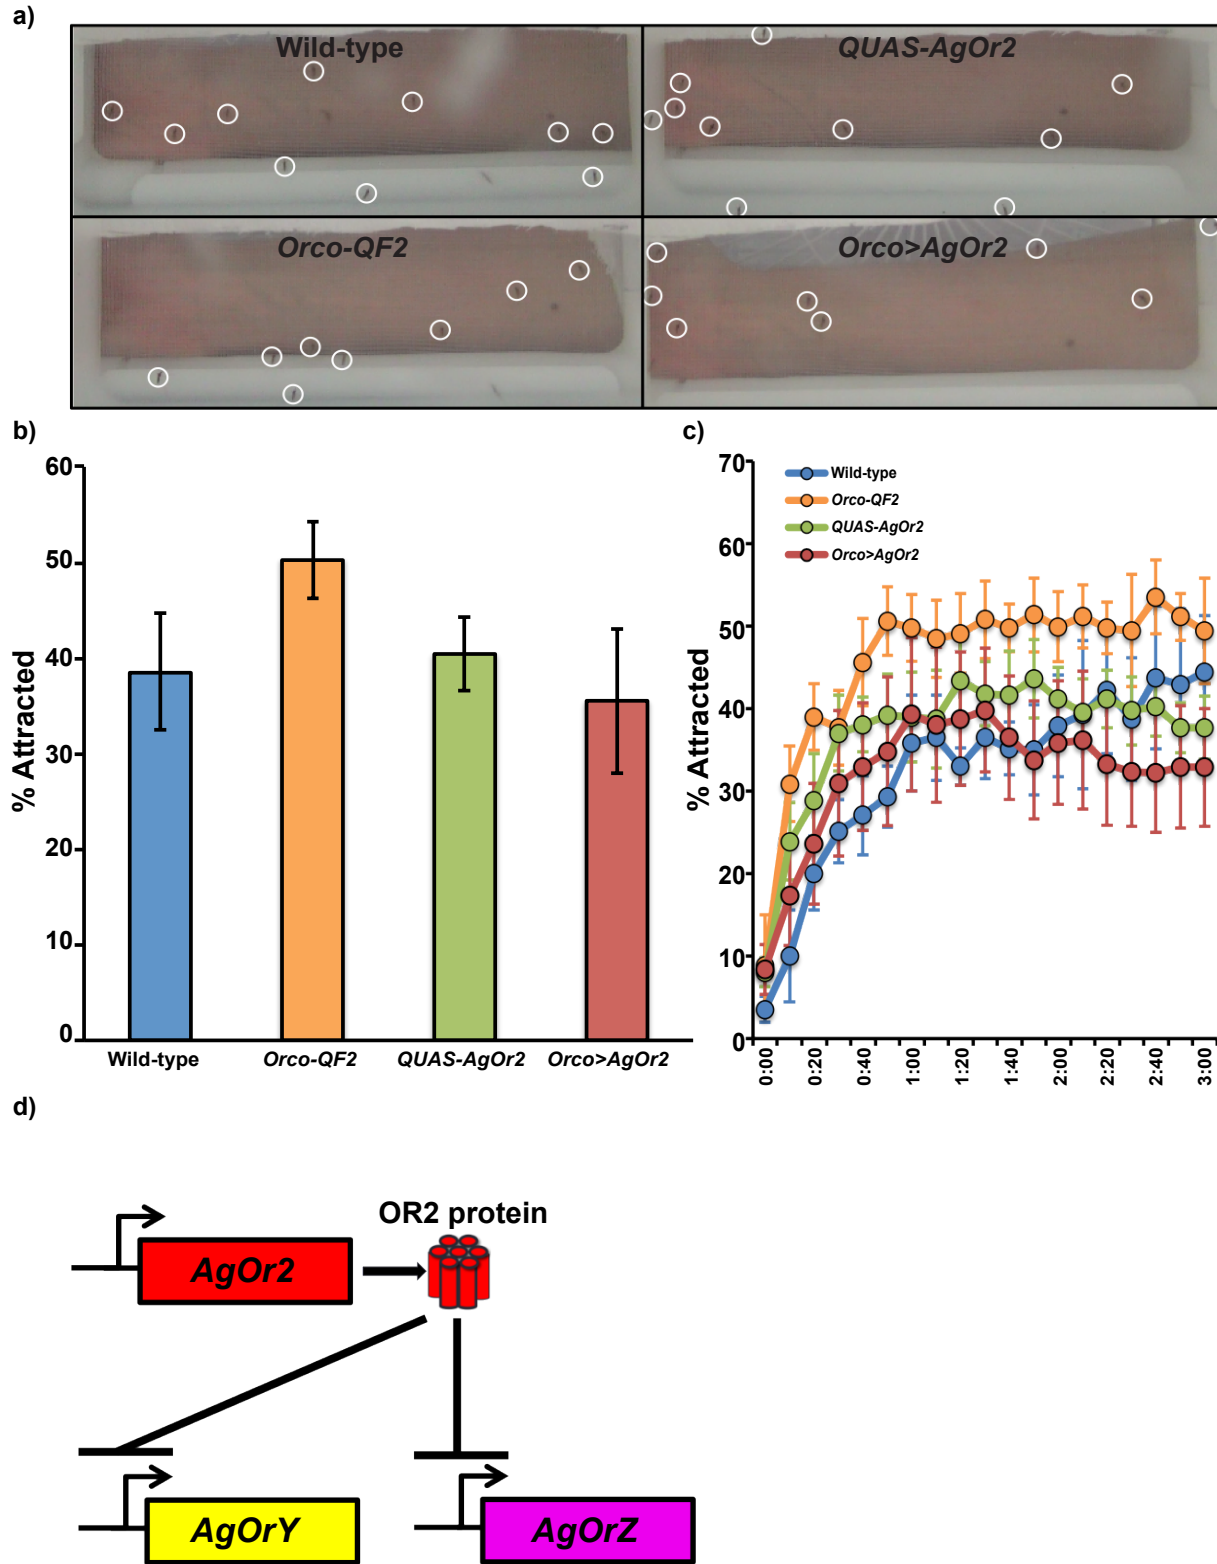

896 Figure 5. *Orco>AgOr2* mosquitoes remain attracted to a human host. a)

897 Representative images of wild-type, *Orco-QF2*, *QUAS-AgOr2*, and *Orco>AgOr2*

898 mosquitoes (circled) in the host-proximity assay. Mosquitoes attracted to an arm (2.5cm  
899 from the cage) that land on the net are counted. **b) Results of the host-proximity**  
900 **assay.** A one-way ANOVA between subjects was conducted to compare the effect of  
901 genotype on % attraction. There was no effect of genotype on % attraction at the  $p < 0.05$   
902 level for the four groups ( $F(3) = 1.08$ ,  $p = .37$ ). Error bars represent the standard error  
903 (SEM). 20-30 female mosquitoes were tested *per* trial. The number of trials *per*  
904 genotype:  $n_{\text{Wild-type}} = 5$ ;  $n_{\text{Orco-QF2}} = 5$ ;  $n_{\text{QUAS-AgOr2}} = 7$ ;  $n_{\text{Orco>AgOr2}} = 7$  **c) Time course of**  
905 **mosquito attraction towards a human host by genotype.** Over the course of 3  
906 minutes, there was no difference in the % of mosquitoes attracted to a human host. **d)**  
907 **Summary Model: ectopic AgOR2 negatively regulates the expression of Or**  
908 **transcripts.** Our data implicates a mechanism of negative regulation of most *Or*  
909 transcripts (for example, *OrY* and *OrZ*) by ectopic AgOR2 protein.



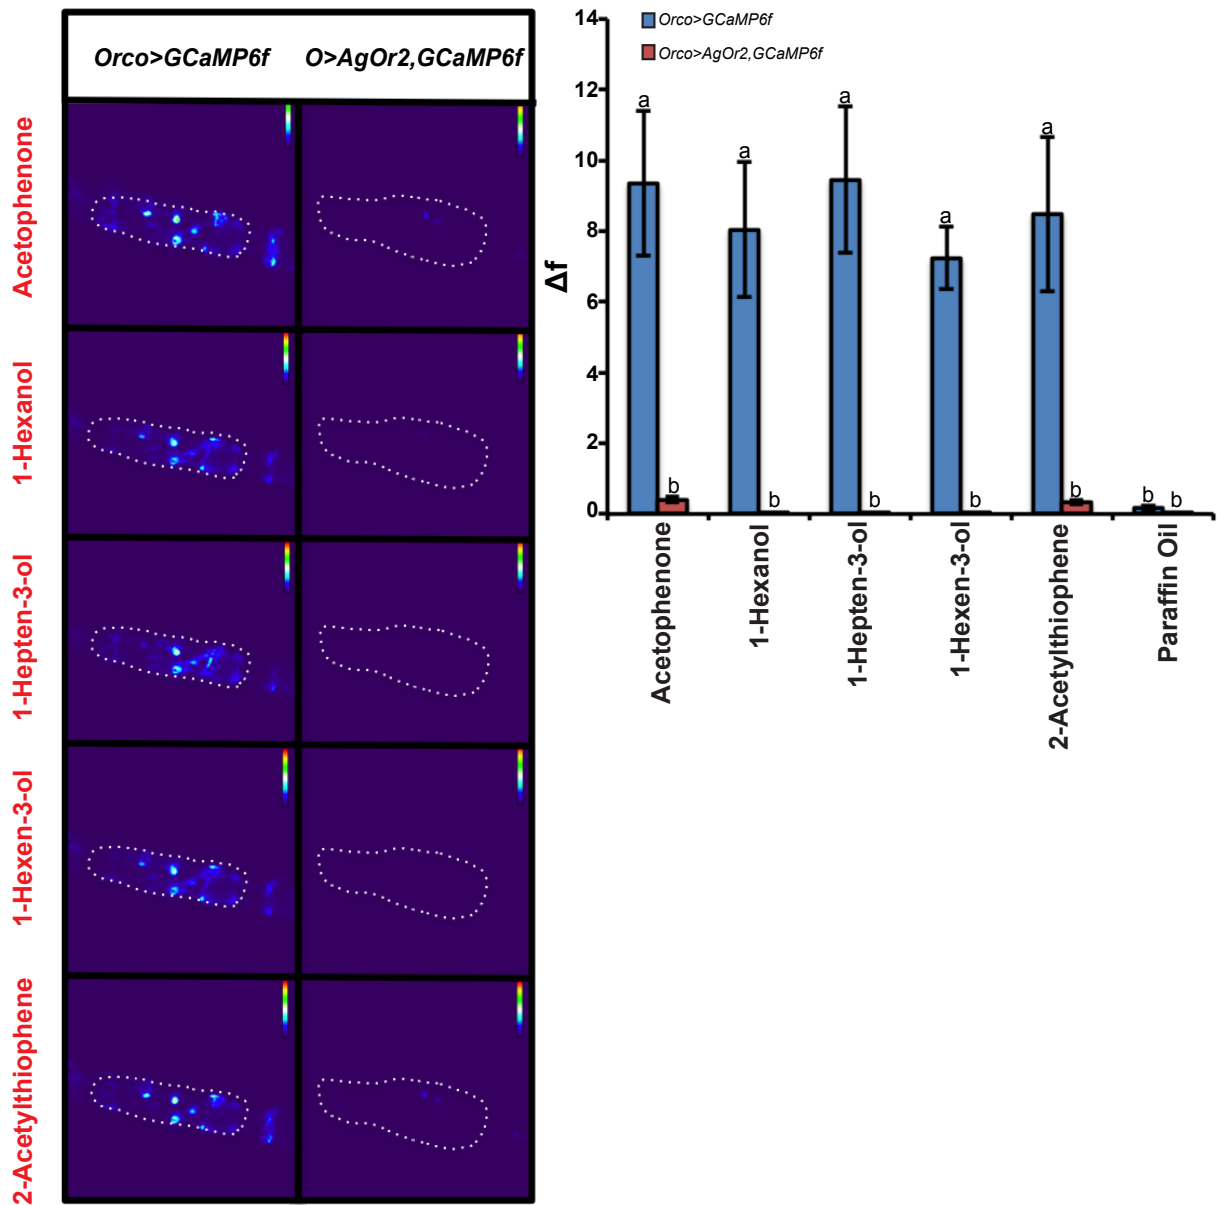

910 **Supplementary Figure 1. Antennae with ectopic *AgOr2* expression fail to respond**  
911 **to odors that activate multiple ORN classes.** The activity of olfactory receptor  
912 neurons in antennal segment 11 (outlined by white dots) towards the listed odors were  
913 detected by calcium imaging of *Orco*-positive neurons expressing GCaMP6f (51).  
914 *Orco>AgOr2,GCaMP6f* is listed here as *O>AgOr2,GCaMP6f*. All odors were presented  
915 at a 10% concentration. A two-way repeated measures ANOVA was used to determine

916 that there was a significant effect at the  $p < 0.005$  level of odor and genotype on calcium  
917 responses. Groups with different letter values (a-b) are statistically different as  
918 determined by the Tukey post hoc HSD test. According to Carey et al. 2010 (16),  
919 acetophenone, 1-hexanol, 1-hepten-3-ol, 1-hexen-3-ol, 2-acetylthiophene activate 16,  
920 14, 16, 14, 15 of the tested ORs, respectively, at a rate of  $\geq 50$  spikes/sec. Each sample  
921 included in the analysis was taken from a different female mosquito.  $n_{Orco > GCaMP6f} = 5$ ,  
922  $n_{Orco > AgOr2, GCaMP6f} = 9$ .

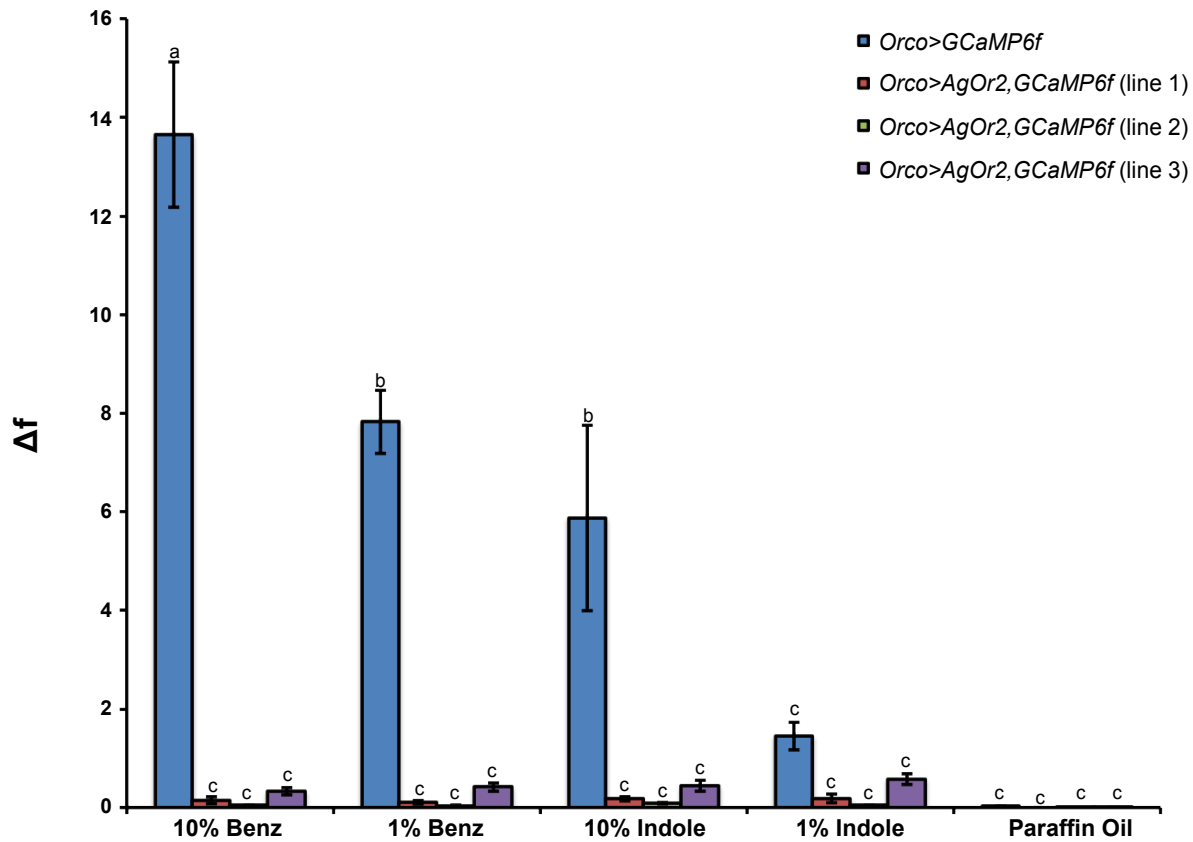

923 **Supplementary Figure 2. The dominant negative phenotype of *Orco>AgOr2* is**  
924 **independent of the *QUAS-AgOr2* insertion site into the genome.** Two additional  
925 *QUAS-AgOr2* lines (lines 2 and 3) show impaired physiology in the presence of  
926 benzaldehyde and indole when compared to wild-type. A two-way repeated measures  
927 ANOVA was used to determine that there was a significant effect of genotype and odor  
928 on calcium responses at the  $p < 0.0001$  level. Groups with different letter values (a-c) are  
929 statistically different as determined by the Tukey post hoc HSD test. Each sample  
930 included in the analysis was taken from a different female mosquito.  $n_{Orco>GCaMP6f} = 9$ ;  
931  $n_{Orco>AgOr2, GCaMP6f (line 1)} = 8$ ;  $n_{Orco>AgOr2, GCaMP6f (line 2)} = 7$ ;  $n_{Orco>AgOr2, GCaMP6f (line 3)} = 9$ .

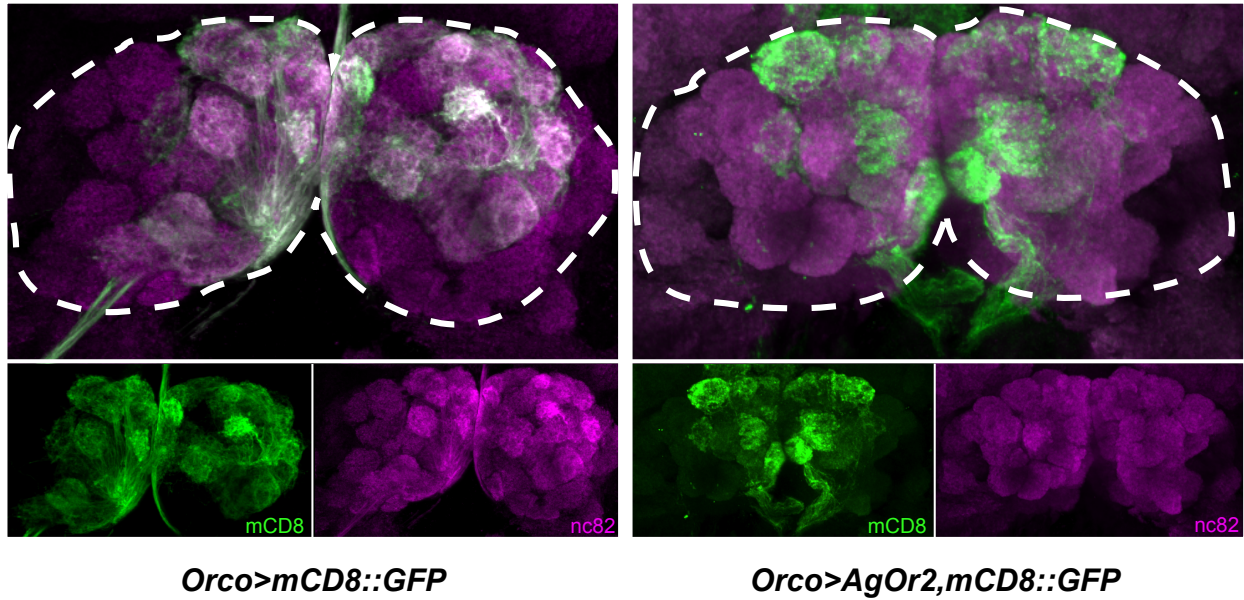

*Orco>mCD8::GFP*

*Orco>AgOr2,mCD8::GFP*

932 **Supplementary Figure 3. Orco-positive neuron processes are present in the adult**  
933 ***Orco>AgOr2,mCD8::GFP* antennal lobe.** Orco-positive ORNs send their projections to  
934 the antennal lobe of control (*Orco>mCD8::GFP*) and experimental (*Orco>AgOr2,*  
935 *mCD8::GFP*) lines. Anti-nc82 was used to visualize the structure of the antennal lobes  
936 and anti-CD8 was used to visualize ORN projections. Antennal lobes are outlined with  
937 white dotted lines.  $n_{Orco>mCD8::GFP} = 9$ ;  $n_{Orco>AgOr2,mCD8::GFP} = 2$ .

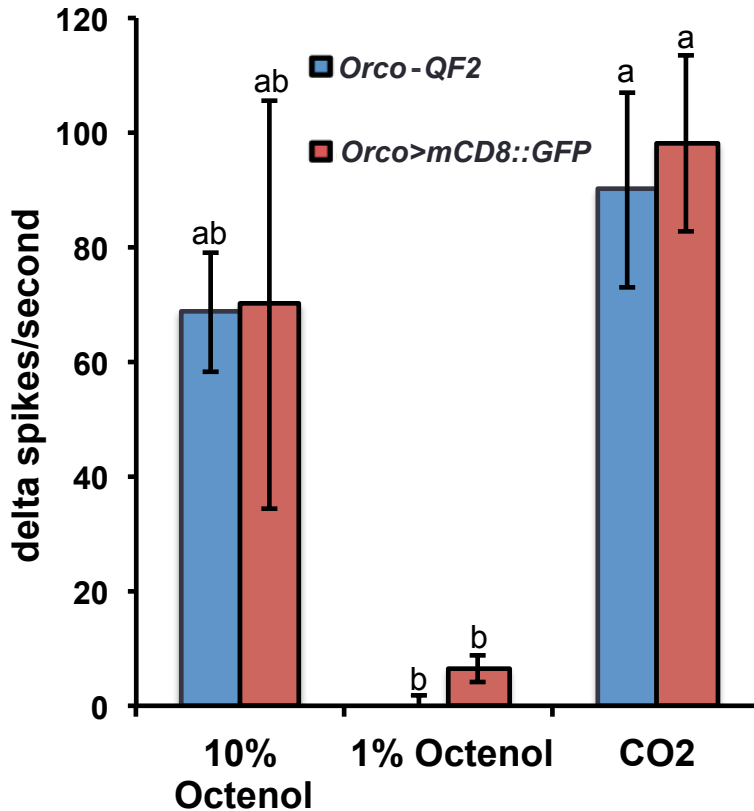

938 **Supplemental Figure 4. Driving a generic membrane-bound protein (*mCD8::GFP*)**  
939 **does not impair *Orco*-positive responses to odor.** Single sensillum recordings were  
940 performed in the maxillary palp capitata peg sensilla. There was no difference in how  
941 cpB/C neurons of *Orco>mCD8::GFP* and *Orco-QF2* genotypes responded to 10% and  
942 1% octenol. The presence of the *Orco*-negative CO<sub>2</sub> neuron was used to verify that we  
943 were recording from a cp sensillum. A two-way repeated measures ANOVA was used to  
944 determine that there was a significant effect at the  $p < 0.005$  level of odor but not  
945 genotype on neuronal responses. Groups with different letter values (a-b) are  
946 statistically different as determined by the Tukey post hoc HSD test. 2-3 Females *per*  
947 genotype were analyzed. The number of sensilla evaluated for each group:  $n_{Orco-QF2} = 6$ ;  
948  $n_{Orco>mCD8::GFP} = 5$ .

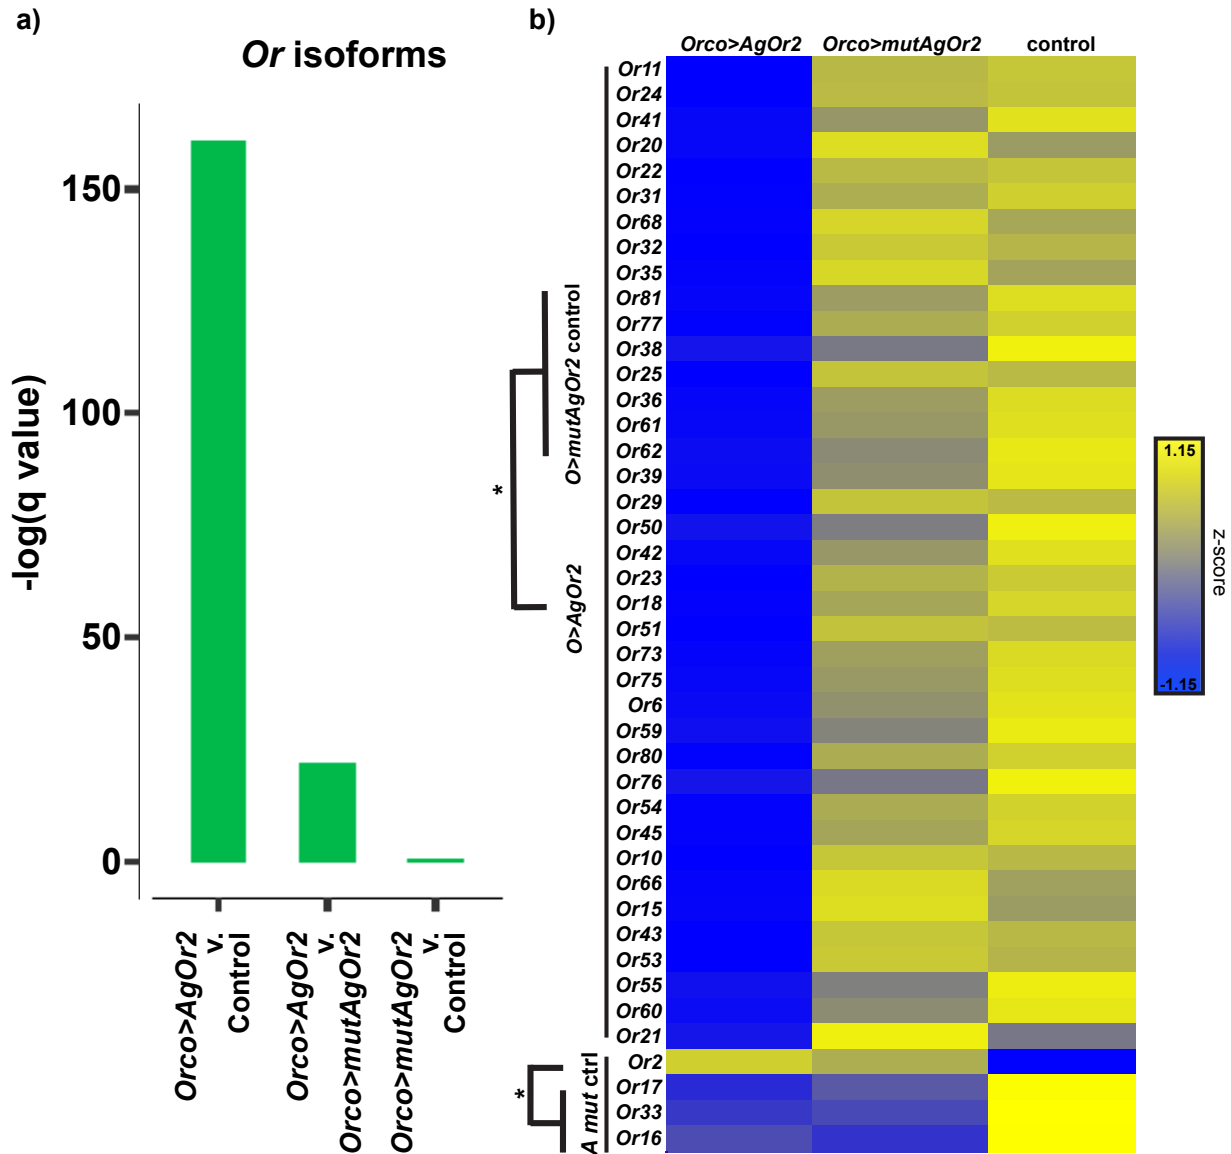

949 **Supplementary Figure 5. The majority of *Ors* are downregulated in *Orco>AgOr2***  
 950 **but not *Orco>mutAgOr2* and control genotypes.** Reads from 3 *Orco>AgOr2*, 3  
 951 *Orco>mutAgOr2*, and 5 control samples were aligned to the *Anopheles gambiae*  
 952 geneset AgamP4.12 (7) and samples were averaged for each group. (a) Results from  
 953 the gene set enrichment test show significant differences in *Or* isoform levels between  
 954 *Orco>AgOr2* v. control and *Orco>AgOr2* v. *Orco>mutAgOr2*. (b) A heatmap was used  
 955 to visualize the results of pair-wise tests comparing the average isoform abundance

956 levels among *Orco>AgOr2*, *Orco>mutAgOr2*, and control groups. The first 39 *Ors* listed  
957 change between control and *Orco>AgOr2* but not control and *Orco>mutAgOr2*. The last  
958 4 *Ors* (*Or2*, *Or17*, *Or33*, *Or16*) are the same between *Orco>AgOr2* (listed as 'A') and  
959 *Orco>mutAgOr2* (listed as 'mut') but different in control (listed as 'ctrl'). *Ors* not included  
960 in the heatmap show no differences among groups. For each cell, a z-score was  
961 calculated by subtracting the mean isoform TPM from the cell's TPM divided by the  
962 standard deviation of the isoform TPM.

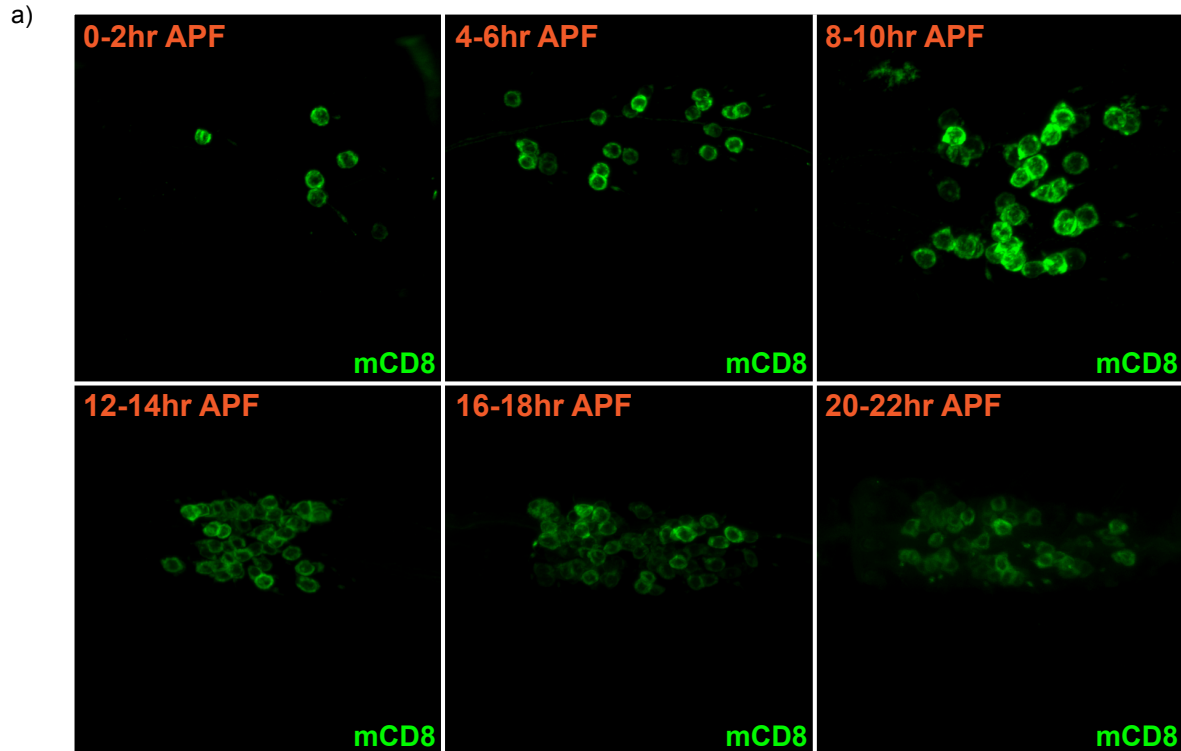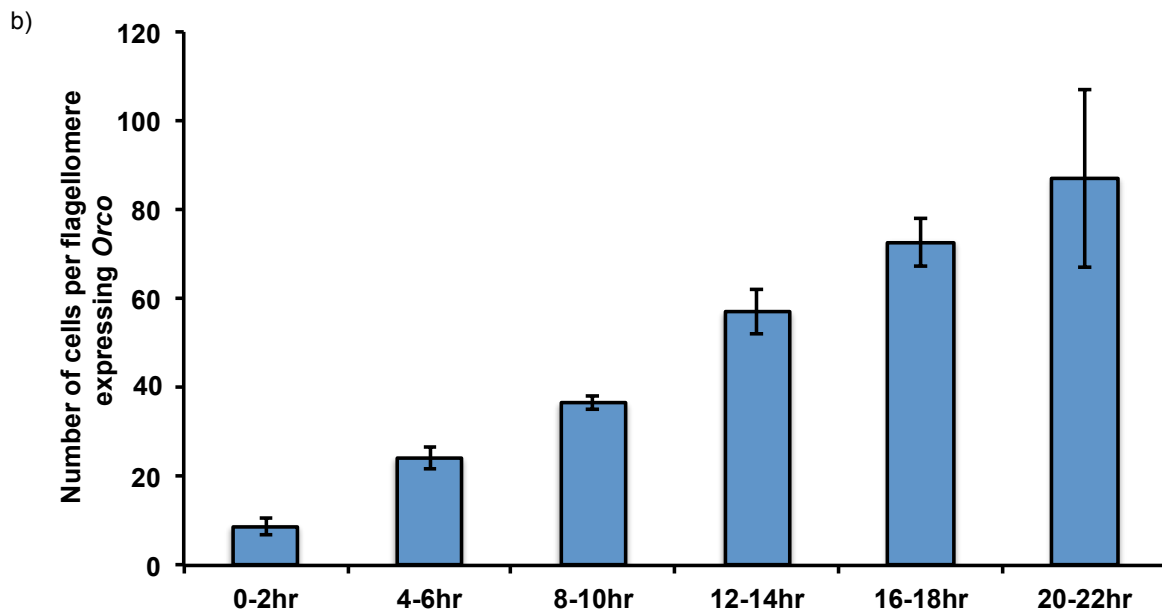

963 **Supplementary Figure 6. ORCO is expressed at the start of pupal ecdysis. a)**

964 Representative images of ORCO-expressing neurons in the *Orco>mCD8::GFP*

965 genotype. Pupal antennae were extracted at the given timepoint After Puparium

966 Formation (APF) and stained for anti-mCD8 (green). **b)** Cells were scored as ORCO-



967 positive based on the presence of mCD8. Cells from one flagellomere per animal in an  
968 average of 5 animals *per* timepoint were scored. The flagellomere that was scored was  
969 randomized for each sample. The error bars represent standard deviation of the mean.
